# Supplementary material
Source: publisher figshare collection journal article supplement (https://acs.figshare.com/ndownloader/files/39662150)
Supplement: Supplementary file 1 [file 39662150]

# Tailoring Catalytic Microenvironment of Cu<sub>2</sub>O with SiO<sub>2</sub> to Enhance C<sub>2+</sub> Products Selectivity in CO<sub>2</sub> Electroreduction

Tete Zhao<sup>†</sup>, Jinhan Li<sup>†</sup>, Jiuding Liu<sup>†</sup>, Fangming Liu<sup>†</sup>, Keqiang Xu<sup>†</sup>, Meng Yu<sup>†\*</sup>, Wence Xu<sup>†</sup>, and  
Fangyi Cheng<sup>†‡\*</sup>

*<sup>†</sup>Key Laboratory of Advanced Energy Materials Chemistry (Ministry of Education), Engineering  
Research Center of High-efficiency Energy Storage (Ministry of Education), College of  
Chemistry, Nankai University, Tianjin 300071, China;*

*<sup>‡</sup>Haihe Laboratory of Sustainable Chemical Transformations, Tianjin 300192, China.*

\*Corresponding author

Email: 819051@nankai.edu.cn; fycheng@nankai.edu.cn

## 1. MD simulations

To uncover the mechanism of enhanced  $C_{2+}$  products selectivity of  $CO_2RR$  by introducing the hydrophobic  $SiO_2$  aerosol, coarse-grained molecular dynamic simulations (CGMD) were employed in this study. All the CGMD simulations were performed using GROMACS 4.6.7 software with Martini force field.<sup>1,2</sup> We aim to investigate the effect of Hydrophobic  $SiO_2$  aerosol on the diffusion coefficients of  $H_2O$  and  $CO_2$  both on  $Cu_2O$  and  $Cu_2O/SiO_2$  electrodes. Before the simulations, we carefully constructed the  $Cu_2O$  by arranging several hydrophilic Nda-type (Nda is a parameter in the Martini force field, which represents hydrophilic) beads into a sheet with the shape of 8 nm in side length and 1.7 nm in height. The hydrophobic  $SiO_2$  aerosol was constructed by arranging several hydrophobic C4-type (C4 is a parameter in the martini force field, which represents hydrophobic  $SiO_2$ ) beads into a sphere with a diameter of 3 nm. The  $CO_2$  bubbles were constructed by stacking 504 hydrophobic beads into a spherical shape with a diameter of 5 nm. The initial size of the simulation box was  $8.0 \times 8.0 \times 16.0 \text{ nm}^3$  and full of water molecules. NVT ensemble (constant particle number, volume, and temperature) was used in our simulations. Temperature is kept as a constant at 300 K using the Berendsen weak coupling algorithm with a time constant of 1 ps. The neighbor list for nonbonded interactions was updated

every 10 steps. The Lennard-Jones potential was smoothly shifted to zero between 0.9 nm and 1.2 nm to reduce the cutoff noise. For electrostatic interactions, the coulombic potential, with a cutoff of 1.2 nm was smoothly shifted to zero from 0 to 1.2 nm. Herein, a time step of 20 fs was used for all simulations. Periodic boundary conditions were implemented in all three directions.

## 2. DFT calculations

Density functional theoretical (DFT) calculations were performed in Vienna Abinitio Simulation Package (VASP)<sup>3</sup> with plane wave basis sets and projector-augmented wave (PAW) pseudopotentials.<sup>4</sup> The generalized gradient approximation (GGA) developed by Perdew-Burke-Ernzerhof (PBE)<sup>5</sup> was implemented for exchange-correlation functions. The kinetic cutoff energy was set as 500 eV for the calculations. The structures were fully relaxed until the energy and the force on each atom converged  $1 \times 10^{-5}$  eV. The forces on the individual relaxed atoms was less than 0.02 eV/Å. The anion  $\text{HCO}_3^-$  was placed on the  $2 \times 2$   $\text{Cu}_2\text{O}$  (111) surface to simulate the energy change, in which  $\text{HCO}_3^-$  dissociates to form the protons and carbonates. The  $\text{H}_2\text{O}$  molecular was also placed on the  $2 \times 2$   $\text{Cu}_2\text{O}$  (111) surface to calculate the dissociation energy, which forms protons and hydroxyls. To avoid the interactions between periodic slabs, a vacuum space was inserted at the z direction at least 20 Å. A tow-layer ( $2 \times 2$ )  $\text{Cu}_2\text{O}$  (111) surface was

constructed to calculate the dissociation of  $\text{HCO}_3^-$  and  $\text{H}_2\text{O}$ . Dipole corrections were included in all surface calculations in the surface normal direction (LDIPOL = TRUE, IDIPOL = 3). Over these optimized structures, vibration frequencies were calculated to obtain zero-point energies, thermal corrections, and entropy contributions, and the convergence tolerance was set to  $1 \times 10^{-6}$  eV. When calculating the vibration frequencies, only the adsorbed species were allowed to relax.

The dissociation process can be written as (an asterisk \* represents the active site):

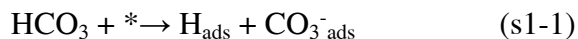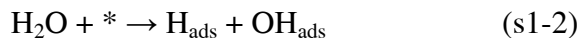

The Gibbs free energy change ( $\Delta G$ ) of each dissociation process was calculated by:

$$\Delta G = \Delta E + \Delta \text{ZPE} - T\Delta S \quad (\text{s1-3})$$

where  $\Delta E$ ,  $\Delta \text{ZPE}$ ,  $T$ , and  $\Delta S$  of each adsorbed state were obtained from DFT calculation, whereas the entropy for gas-phase molecules was taken from the NIST database. Here, the temperature  $T$  is 298.15 K.

### 3. Experimental section

#### 3.1 Chemicals and reagents

SiO<sub>2</sub> (with a specific surface area of ~300 m<sup>2</sup> g<sup>-1</sup>), ascorbic acid (C<sub>6</sub>H<sub>8</sub>O<sub>6</sub>, A.R. grade), cupric chloride dihydrate (CuCl<sub>2</sub>·2H<sub>2</sub>O, A.R. grade), sodium hydroxide (NaOH, purity ≥ 98%), dimethyl sulfoxide (C<sub>2</sub>H<sub>6</sub>SO, G.C. grade) and isopropyl alcohol (C<sub>3</sub>H<sub>8</sub>O, A.R. grade) were purchased from Shanghai Aladdin Biochemical Technology Co., Ltd. Potassium bicarbonate (KHCO<sub>3</sub>, purity ≥ 99.99% metals basis, 99.7-100.5% dry basis), absolute ethanol (C<sub>2</sub>H<sub>6</sub>O, Medicinal grade) were supplied by Shanghai Macklin Biochemical Co., Ltd. Deuterium oxide (D<sub>2</sub>O, purity ≥ 99.9%) was bought from Ai Lan (Shanghai) Chemical Technology Co., Ltd. Nafion D-521 dispersion, 5% W/W in water and 1-propanol, ≥ 0.92 meq/g exchange capacity was brought from the Alfa Aesar China Chemical Co., Ltd. Nafion 117 proton exchange membrane was bought from DuPont. All chemicals and reagents were purchased and used without further treatment.

### 3.2 Cu<sub>2</sub>O synthesis

Cu<sub>2</sub>O cubes were synthesized according to the previous report.<sup>6</sup> In short, a dilute solution of CuCl<sub>2</sub> was obtained by adding 7 mL 0.1 M CuCl<sub>2</sub>·2H<sub>2</sub>O to 300 mL of deionized water. Subsequently, 21 mL 0.2 M NaOH solution was added dropwise to the light blue solution for 10 minutes under continuous stirring. When the small light blue particles appeared, 14 mL 0.1 M C<sub>6</sub>H<sub>8</sub>O<sub>6</sub> solution was further added into the mixture solution drop by drop in less than 10 minutes.

The suspension was then stirred strictly for another hour after the color turned yellow. The  $\text{Cu}_2\text{O}$  cubes were precipitated by centrifugation and washed three times with deionized water and two times with absolute ethanol. Then the earthy yellow precipitation was transferred to a vacuum oven and dried at 60 °C overnight.

### 3.3 Preparation of $\text{Cu}_2\text{O}$ and $\text{Cu}_2\text{O}/\text{SiO}_2$ electrodes

The  $\text{Cu}_2\text{O}$  slurry was prepared by ultrasonically blending 10 mg  $\text{Cu}_2\text{O}$ , 1 mL of isopropyl alcohol, and 20  $\mu\text{L}$  of 5% Nafion solution for 30 minutes until forming the uniform suspension. Subsequently, 20  $\mu\text{L}$  of the obtained  $\text{Cu}_2\text{O}$  slurry was carefully dropped on the surface of carbon glassy (diameter, 6mm) and thoroughly dried at room temperature. This working electrode was named  $\text{Cu}_2\text{O}$  and the loading was 0.708 mg  $\text{cm}^{-2}$ . To prepare the  $\text{Cu}_2\text{O}/\text{SiO}_2$  working electrode, different dosages of hydrophobic  $\text{SiO}_2$  aerosol were first dissolved into 1 mL of isopropyl alcohol and sonicated to form clear suspension. Secondly, different concentrations of suspensions of hydrophobic  $\text{SiO}_2$  aerosol and the 10 mg  $\text{mL}^{-1}$  of  $\text{Cu}_2\text{O}$  were instantly blended by sonication. The  $\text{Cu}_2\text{O}/\text{SiO}_2\text{-x}$  (x represents the concentration of hydrophobic  $\text{SiO}_2$  aerosol, and corresponds to 1, 2, 3, 4, and 5 mg  $\text{mL}^{-1}$ ) compound slurry was obtained for further use. For example,  $\text{Cu}_2\text{O}/\text{SiO}_2\text{-2}$  electrode was prepared by mixing the hydrophobic  $\text{SiO}_2$  solution with 2

mg mL<sup>-1</sup> and Cu<sub>2</sub>O suspension with 10 mg mL<sup>-1</sup>. For short, the Cu<sub>2</sub>O/SiO<sub>2</sub>-2 working electrode was abbreviated as Cu<sub>2</sub>O/SiO<sub>2</sub>. The Cu<sub>2</sub>O/SiO<sub>2</sub>-1, Cu<sub>2</sub>O/SiO<sub>2</sub>-3, Cu<sub>2</sub>O/SiO<sub>2</sub>-4, and Cu<sub>2</sub>O/SiO<sub>2</sub>-5 working electrodes were prepared followed by the Cu<sub>2</sub>O/SiO<sub>2</sub>-2 electrode. Then, we prepared the hydrophobic working electrode Cu<sub>2</sub>O/SiO<sub>2</sub> by dropped the 40 µL as-prepared suspension onto the carbon glassy and dried at room temperature. The loading of Cu<sub>2</sub>O/SiO<sub>2</sub> working electrode was the same as the Cu<sub>2</sub>O working electrode.

### **3.4 In situ infrared spectroscopy investigations**

Electrochemical in situ FT-IR reflection spectroscopy was investigated on a Fourier transform infrared spectrometer (FTIR, Nicolet iS50, Thermo Fisher Scientific, USA) equipped with Mercury Cadmium Telluride (MCT) detector, which was cooled with the liquid nitrogen atmosphere for protection and drove the interferential CO<sub>2</sub> in the atmosphere. We adopted the three electrodes test system to evaluate the change at the surface of the Cu<sub>2</sub>O and Cu<sub>2</sub>O/SiO<sub>2</sub> working electrodes. The reflective window was made up of CaF<sub>2</sub> crystal. The working electrodes were prepared by supporting the catalyst ink on the surface of carbon glassy (diameter 5 mm) and dried at room temperature before measurements. Real-time FTIR spectra were recorded during the chronopotentiometry test. The working potentials from open circuit potential (OCP) to

−1.2 V vs. RHE in a CO<sub>2</sub>-saturated 0.1 M KHCO<sub>3</sub>. The stepping width and test time are 100 mV and 80 s, respectively.

### 3.5 Electrochemical CO<sub>2</sub> reduction and gaseous product analysis

The electrochemical measurements were implemented using an electrochemistry workstation (CHI760e, CH, Shanghai). We adopted the self-designed gas-tight H-type electrochemical cell separated by a proton exchange membrane (Nafion N-117, Dupont, USA) to evaluate the electrochemical performance of the Cu<sub>2</sub>O and Cu<sub>2</sub>O/SiO<sub>2</sub> working electrodes. The electrolyte solution was prepared by dissolving the specific dosage of potassium bicarbonate in Milli-Q water to form the uniform 0.1 M KHCO<sub>3</sub> solution. The three-electrode compartment was adopted to evaluate the performances of different working electrodes. Working electrodes were prepared by as-prepared Cu<sub>2</sub>O dropped onto the surface of glassy carbon. A Pt foil was used as the counter electrode and an Ag/AgCl electrode (saturated KCl) as a reference electrode. All potentials were converted to scales against an RHE reference:  $E \text{ (vs. RHE)} = E \text{ (vs. Ag/AgCl)} + 0.0592 \text{ pH} + 0.198 \text{ V}$ . All the potentials are iR-compensated by 85%. The potentials were compensated as  $E \text{ (iR corrected vs. RHE)} = E \text{ (vs. RHE)} - R_s \times I$ .  $R_s$  is the 0.1 M KHCO<sub>3</sub> solution resistance, which was measured by EIS performing on a CHI760e electrochemistry workstation at a frequency



range of  $10^{-2}$ ~ $10^5$  and fitted by Z-plot software. The cathodic compartment was added to 35 mL 0.1 M  $\text{KHCO}_3$  solution and the anodic compartment was added to 30 mL 0.1 M  $\text{KHCO}_3$  solution to maintain the balance of the level of liquid to avoid the difference in dropout voltage. Before testing, the 0.1 M  $\text{KHCO}_3$  solution in the cathodic compartment was saturated by bubbling  $\text{CO}_2$  gas for 30 minutes until the 0.1 M  $\text{KHCO}_3$  solution was saturated (pH = 6.8). In a typical electrolysis process, the reactions were maintained for a specific time with continuous  $\text{CO}_2$  bubbling at a flow rate of  $6.8 \text{ mL min}^{-1}$ . In real-time electrolysis, the gaseous products were directly purged into the gas chromatograph (GC, Shimadzu 2010 plus) equipped with the BID detector to analyze the generated  $\text{H}_2$ ,  $\text{CO}$ ,  $\text{CH}_4$ , and  $\text{C}_2\text{H}_4$ . Ultrapure helium ( $> 99.9999\%$ ) was used as carrier gas.<sup>7,8</sup>

### 3.6 Liquid products identification and quantification

After each electrolysis at different potentials, 30 mL electrolyte was taken out from the H-type electrochemical cell for further analysis. Then, 20  $\mu\text{L}$  DMSO as the internal standard was added into the 30 mL electrolyte solution. Afterwards, 450  $\mu\text{L}$  mixed electrolyte and 50  $\mu\text{L}$   $\text{D}_2\text{O}$  were transferred to a nuclear magnetic resonance (NMR) sample tube and analyzed by  $^1\text{H}$  NMR spectroscopy using the 400 MHz spectrometers (Quantum-1, Zhongke-Niujin MR Tech Co.Ltd,

China) and identifying the liquid products in an electrolyte. The signal of water was suppressed.

The  $^1\text{H}$  peak area of each product in the electrolyte was calculated by the  $^1\text{H}$  peak area of the confirmed concentration of DMSO to quantify the concentration of products.<sup>9,10</sup>

#### **4. Material characterization**

Morphologies and microstructures of as-prepared  $\text{Cu}_2\text{O}$  were performed on a Field emission scanning electron microscopy (SEM, JSM-7900F, JEOL, Japan) at an accelerating voltage of 1.0 kV and high-resolution transmission electron microscopy (HRTEM, Talos F200X G2, FEI Czech Republic, Czech Republic) equipped with EDS. Surface compositions and chemical valence of the catalysts were characterized with X-ray photoelectron spectroscopy (XPS, PHI5000VersaProbe, Ulvac-phi, Japan) with an Al  $\text{K}\alpha$  X-ray source at a power of 44.9 W. High-resolution spectra of Cu 2p and Cu auger LMM were recorded with a 23.5 eV pass energy and 187.85 eV for the XPS survey. The XPS spectra were aligned to the binding energy of C 1s at 284.8 eV for all samples and fitted by XPSPEAK41 software. Ex-situ Fourier transforms infrared spectra were recorded on a Nicolet iS50 infrared spectrometer (Thermo Fisher Scientific, USA) equipped with Mercury Cadmium Telluride (MCT) detector and KBr beam splitter. The crystal structures of the samples were analyzed by X-ray diffraction (XRD,

MimFLEX600, Rigaku, Japan) spectroscopy with Cu K $\alpha$  radiation (40 kV,  $\lambda=1.5406$  Å and 15 mA) at a scan rate of  $8^{\circ} \text{ min}^{-1}$  with  $2\theta$  degree range from  $5^{\circ}$  to  $85^{\circ}$ . Nitrogen adsorption-desorption measurements and surface area were studied on a Micromeritics ASAP 2460 analyzer (USA). Pore volumes and pore sizes were calculated using the density functional theory (DFT) methods according to the pore-size distribution curves from the desorption isotherms. The carbon dioxide adsorption-desorption curves were performed on surface area and microporous analyzer (BSD-PM, Beishied instrument technology, China) at 298.15 K. The contact angles were obtained on dataphysics (OCA25, dataphysics, Germany) with 10  $\mu\text{L}$  electrolyte dropped onto the surface of the working electrodes, hydrophobic  $\text{SiO}_2$  aerosol, and the glassy carbon electrode.

## 5. Additional results and discussion

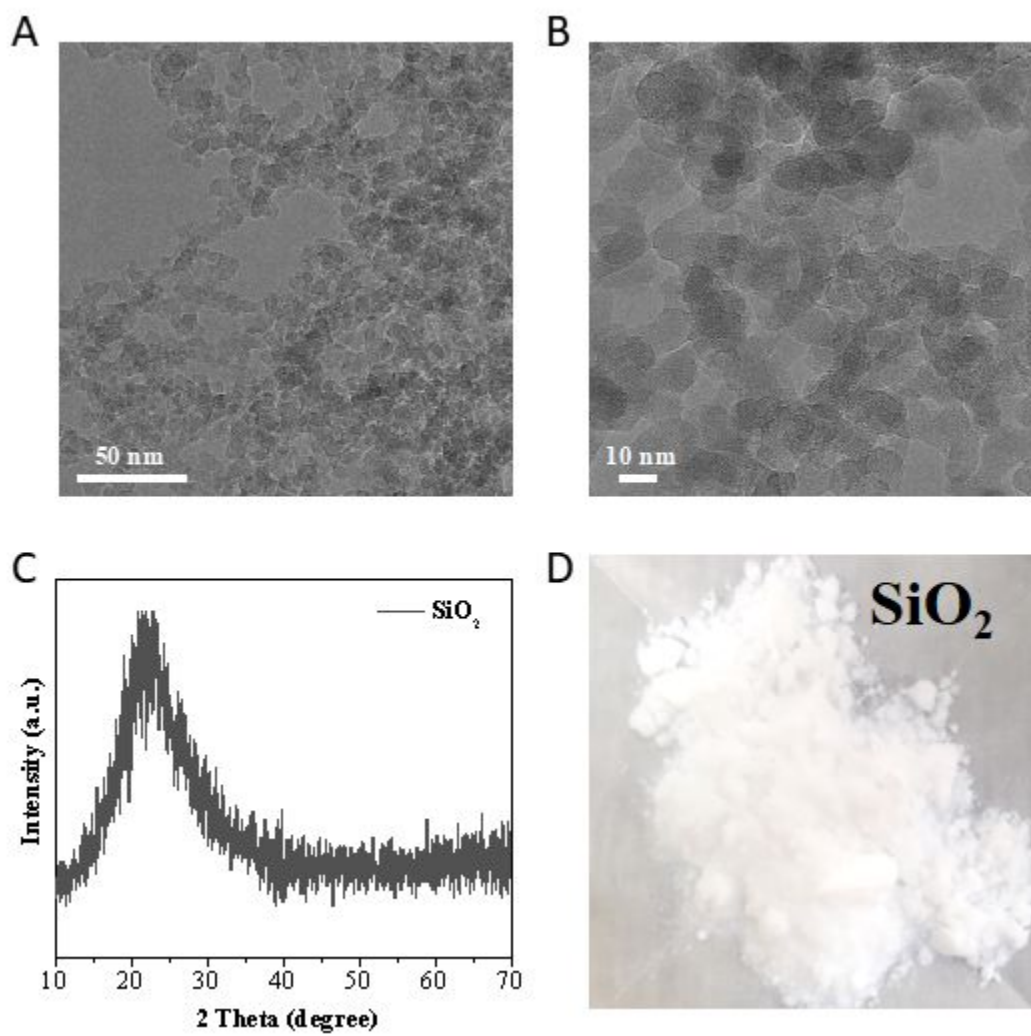

**Figure S1.** (A, B) TEM and HRTEM images, (C) XRD pattern and (D) digital photograph of amorphous  $\text{SiO}_2$ .

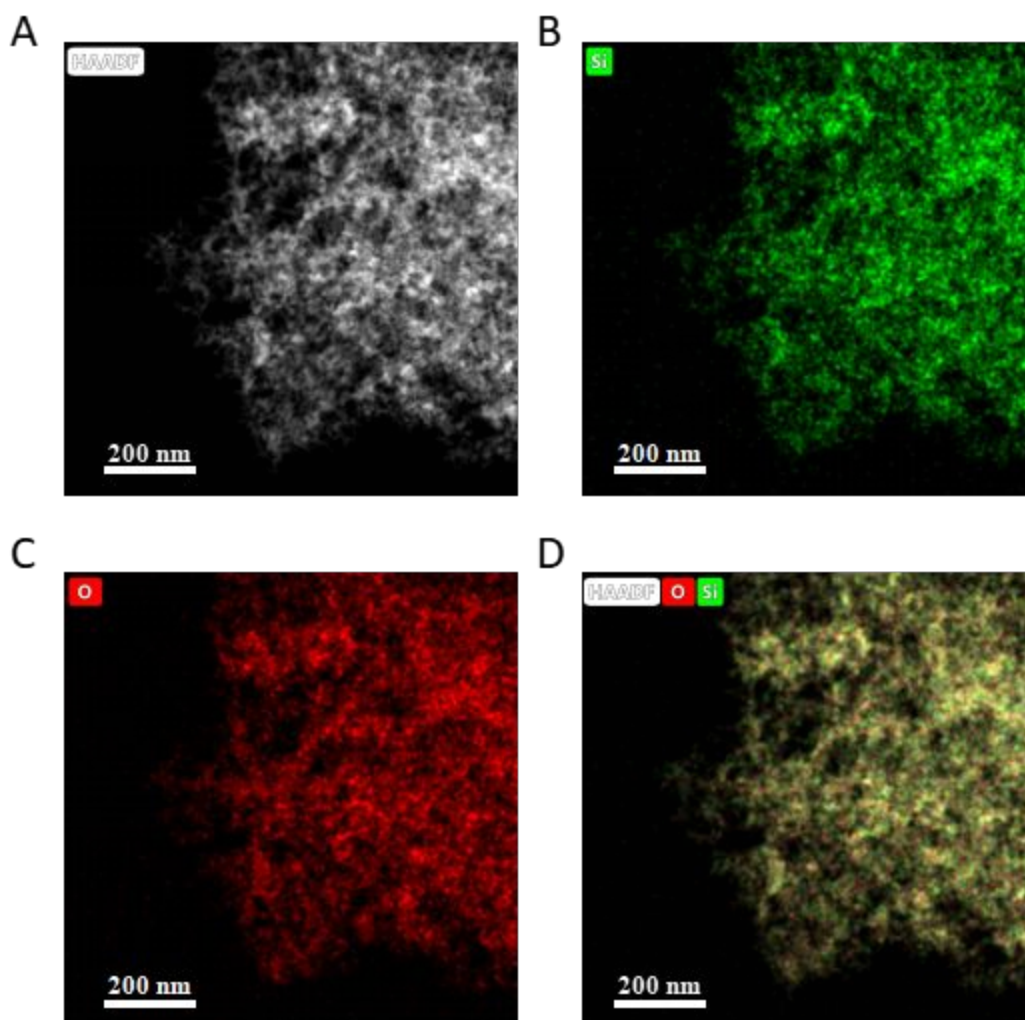

**Figure S2.** (A) HADDF-STEM and corresponding elemental mapping images of (B) Si (green) and (C) O (red) and (D) the elements mixed of amorphous  $\text{SiO}_2$ .

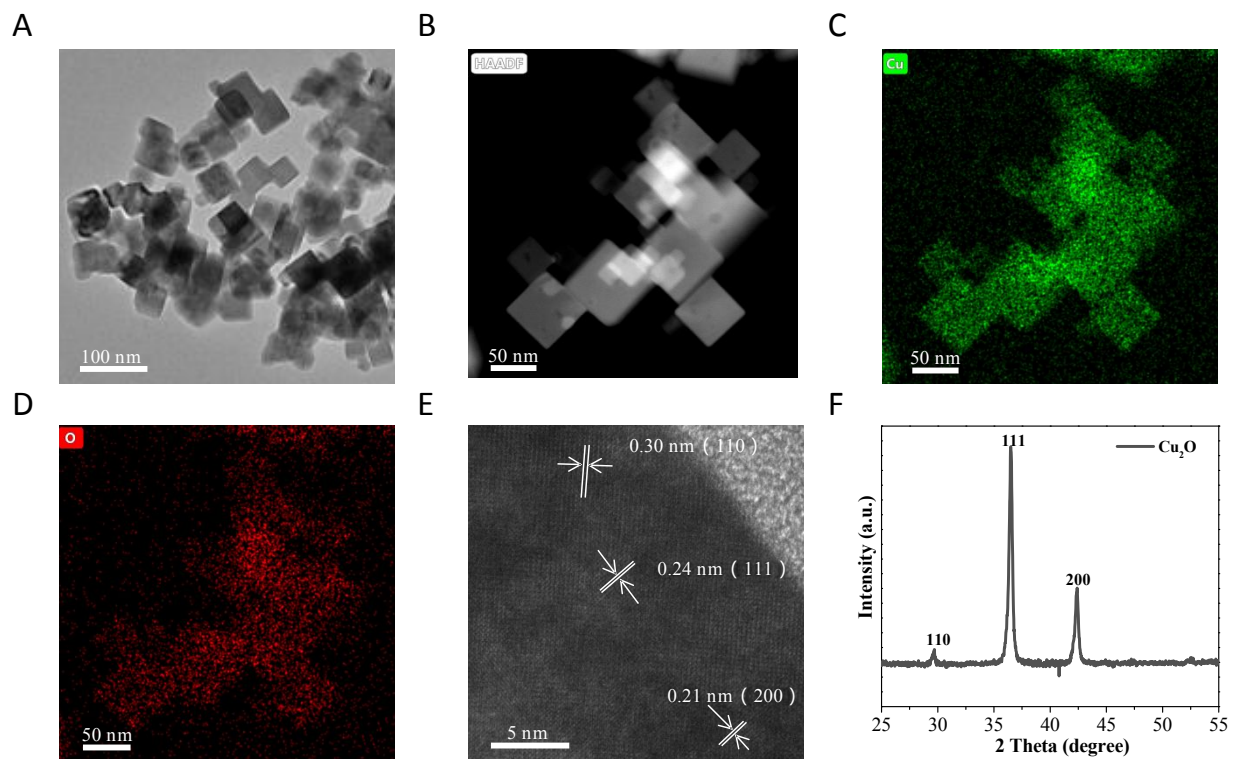

**Figure S3.** (A) TEM and (B) HAADF-STEM and corresponding elemental mapping images with (C) Cu (green), (D) O (red), (E) HRTEM images and (F) XRD pattern of  $\text{Cu}_2\text{O}$ .

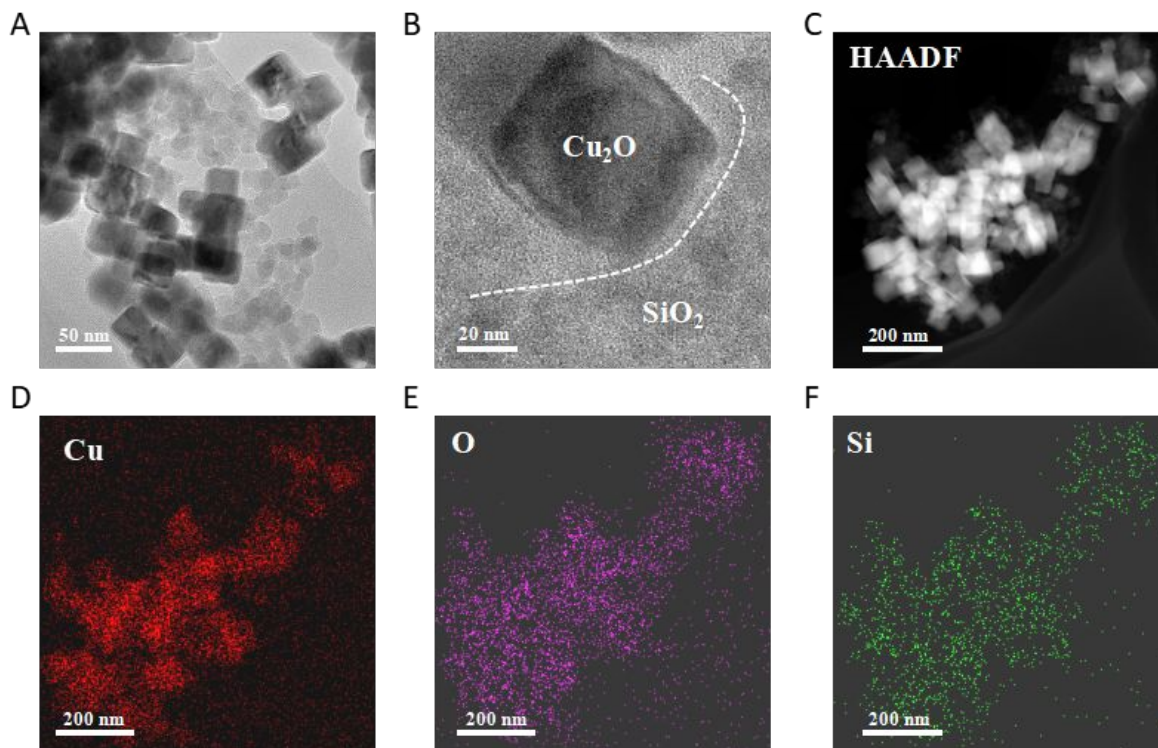

**Figure S4.** (A) TEM, (B) HRTEM, (C) HADDF-STEM images of  $\text{Cu}_2\text{O}/\text{SiO}_2$  composites, the corresponding elemental mapping images with (D) Cu (red), (E) O (purple), (F) Si (green).

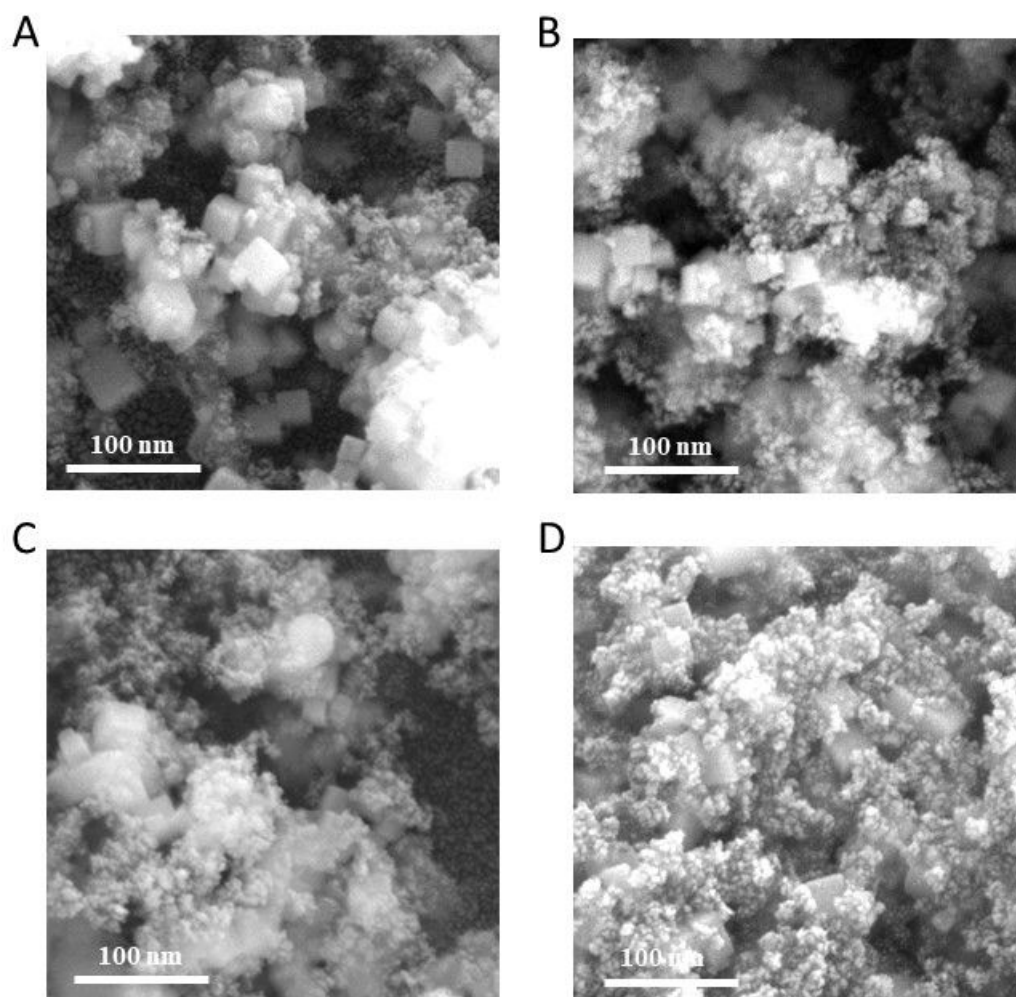

**Figure S5.** SEM images of (A) Cu<sub>2</sub>O/SiO<sub>2</sub>-1, (B) Cu<sub>2</sub>O/SiO<sub>2</sub>-3, (C) Cu<sub>2</sub>O/SiO<sub>2</sub>-4 and (D) Cu<sub>2</sub>O/SiO<sub>2</sub>-5.



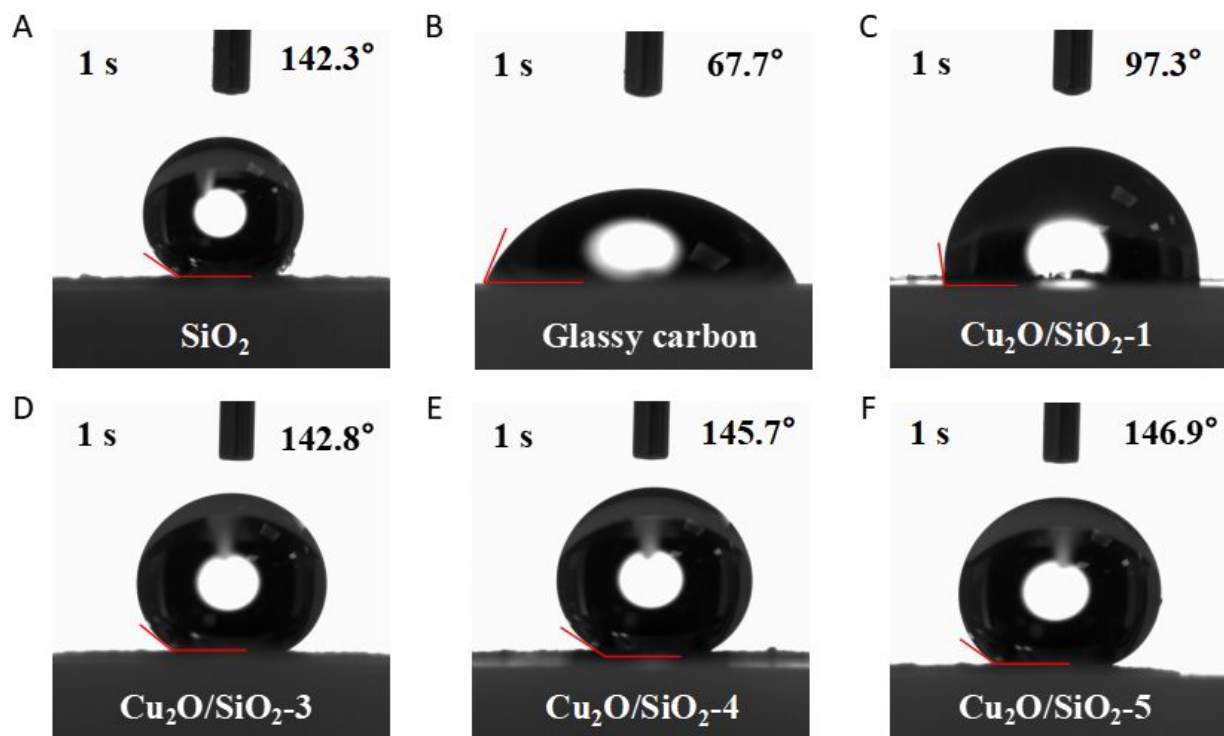

**Figure S6.** Contact angle of (A) SiO<sub>2</sub>, (B) glassy carbon, (C) Cu<sub>2</sub>O/SiO<sub>2</sub>-1, (D) Cu<sub>2</sub>O/SiO<sub>2</sub>-3, (E) Cu<sub>2</sub>O/SiO<sub>2</sub>-4 and (F) Cu<sub>2</sub>O/SiO<sub>2</sub>-5.

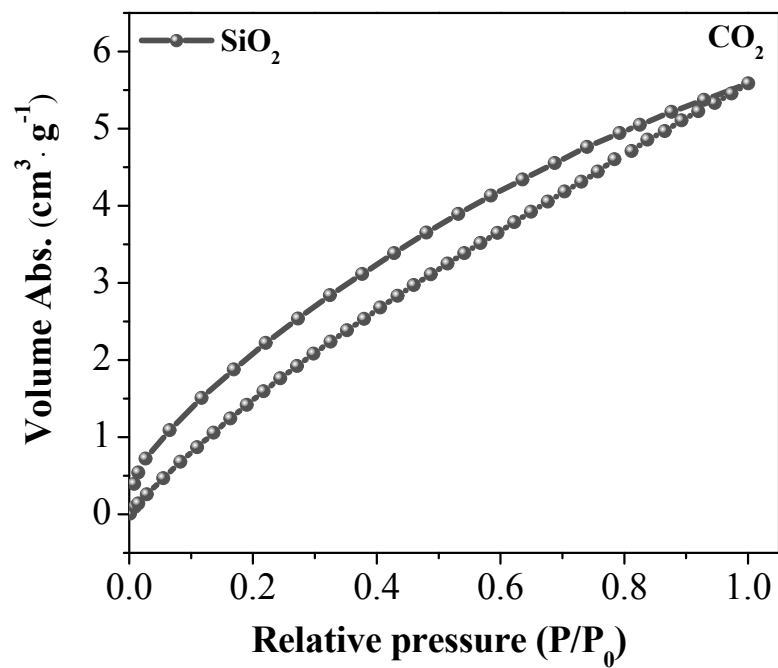

**Figure S7.** CO<sub>2</sub> adsorption-desorption curves of SiO<sub>2</sub>.

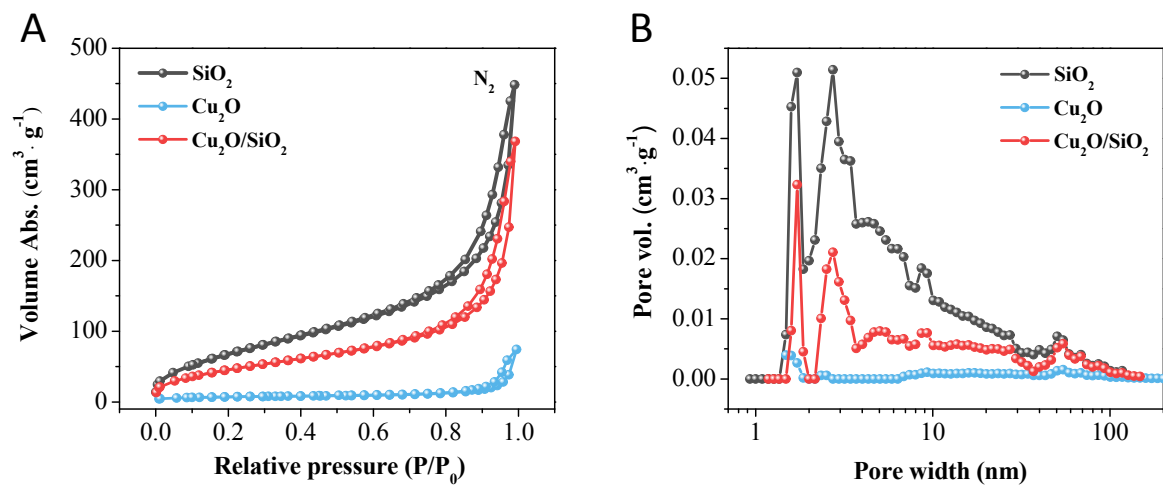

**Figure S8.** (A) N<sub>2</sub> adsorption-desorption curves of  $\text{Cu}_2\text{O}$ ,  $\text{Cu}_2\text{O}/\text{SiO}_2$ , and  $\text{SiO}_2$  and (B) corresponding pore diameter distribution curves.

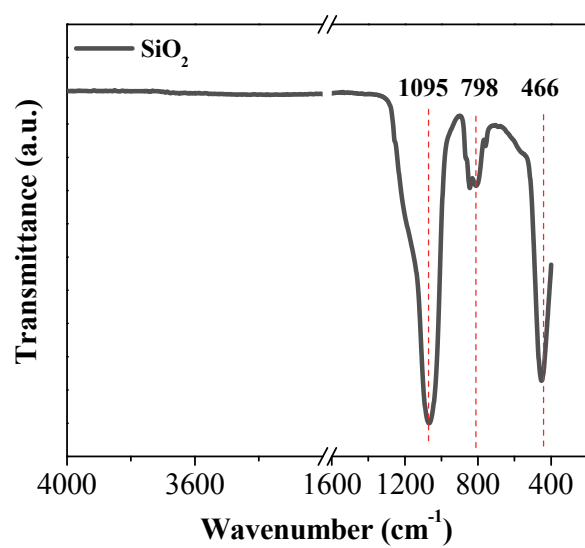

**Figure S9.** FTIR spectrum of SiO<sub>2</sub>.

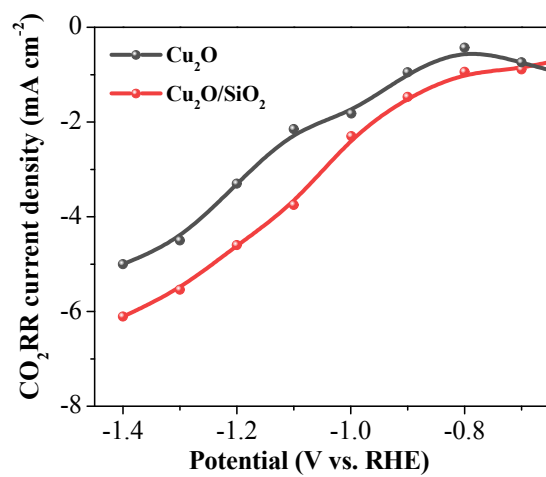

**Figure S10.** Partial current densities for CO<sub>2</sub>RR on the Cu<sub>2</sub>O and Cu<sub>2</sub>O/SiO<sub>2</sub> electrodes at various potentials with CO<sub>2</sub>-saturated 0.1M KHCO<sub>3</sub>.

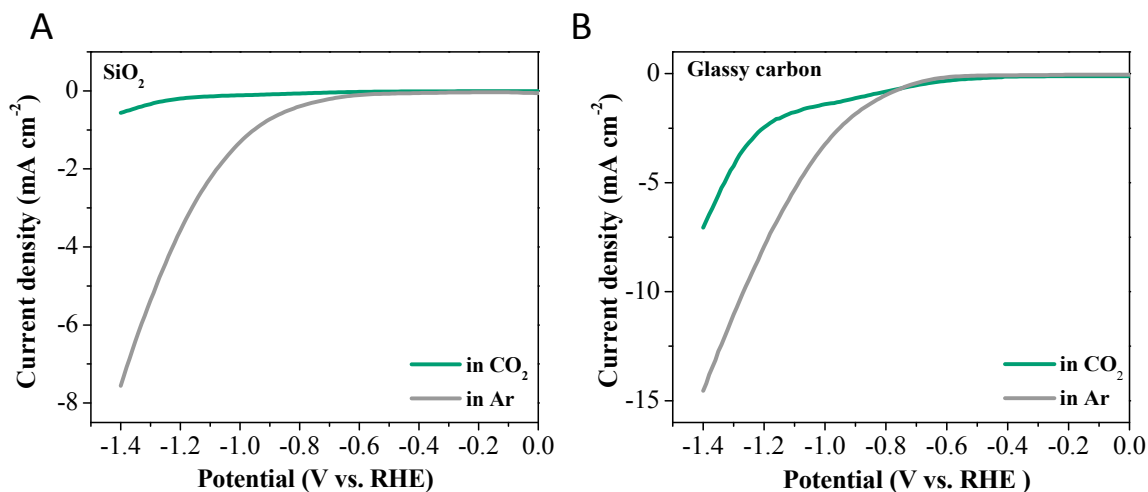

**Figure S11.** LSV curves of (A)  $\text{SiO}_2$  and (B) glassy carbon in  $\text{CO}_2/\text{Ar}$ -saturated 0.1 M  $\text{KHCO}_3$ .

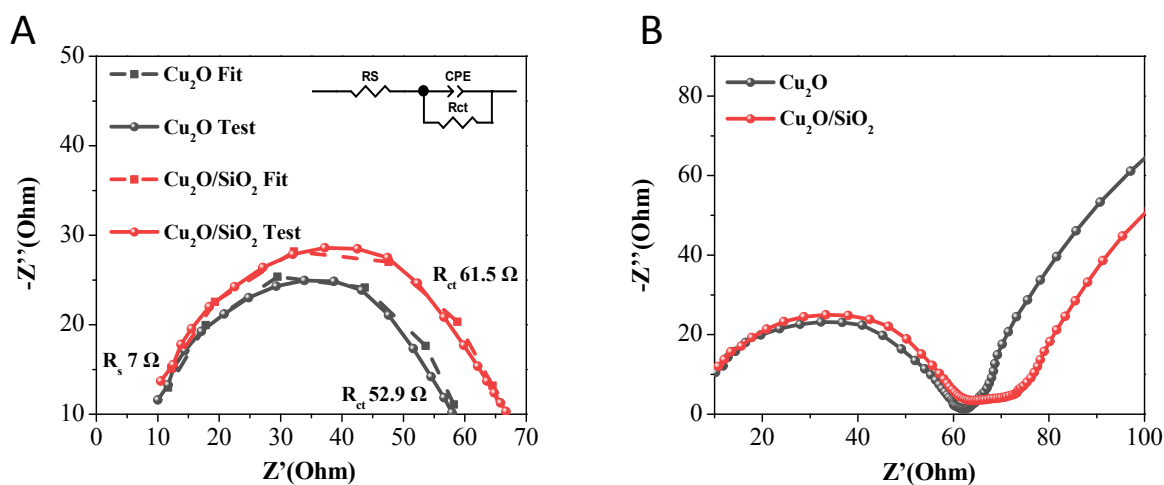

**Figure S12.** (A) Nyquist plots obtained at the specific potential in  $\text{CO}_2$ -saturated 0.1 M  $\text{KHCO}_3$  and the corresponding fitting equivalent circuit diagram on  $\text{Cu}_2\text{O}$  and  $\text{Cu}_2\text{O}/\text{SiO}_2$ , (B) EIS spectra of  $\text{Cu}_2\text{O}$  and  $\text{Cu}_2\text{O}/\text{SiO}_2$  from the 100 kHz to 0.01 Hz.

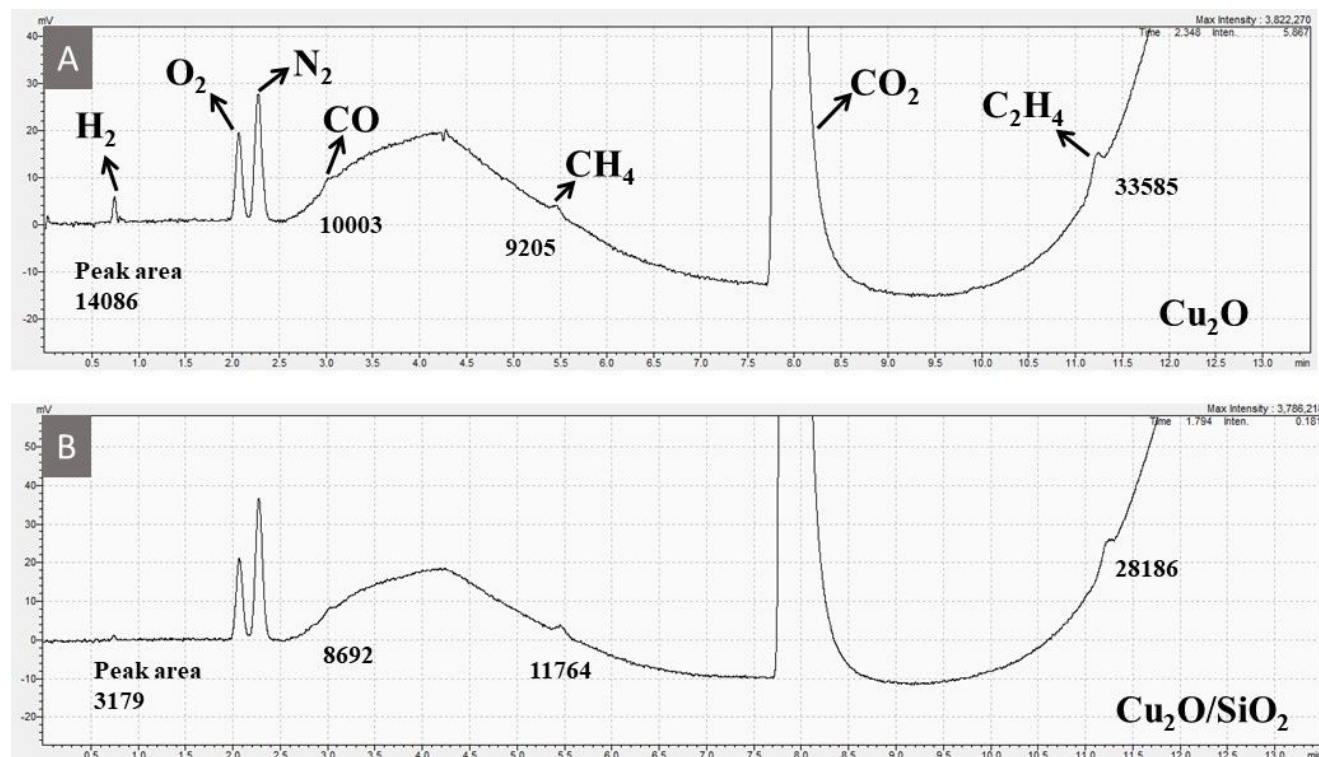

**Figure S13.** Gas chromatography (GC) data recorded after electrolysis on (A)  $Cu_2O$ , and (B)  $Cu_2O/SiO_2$  at  $-1.2$  V vs. RHE.

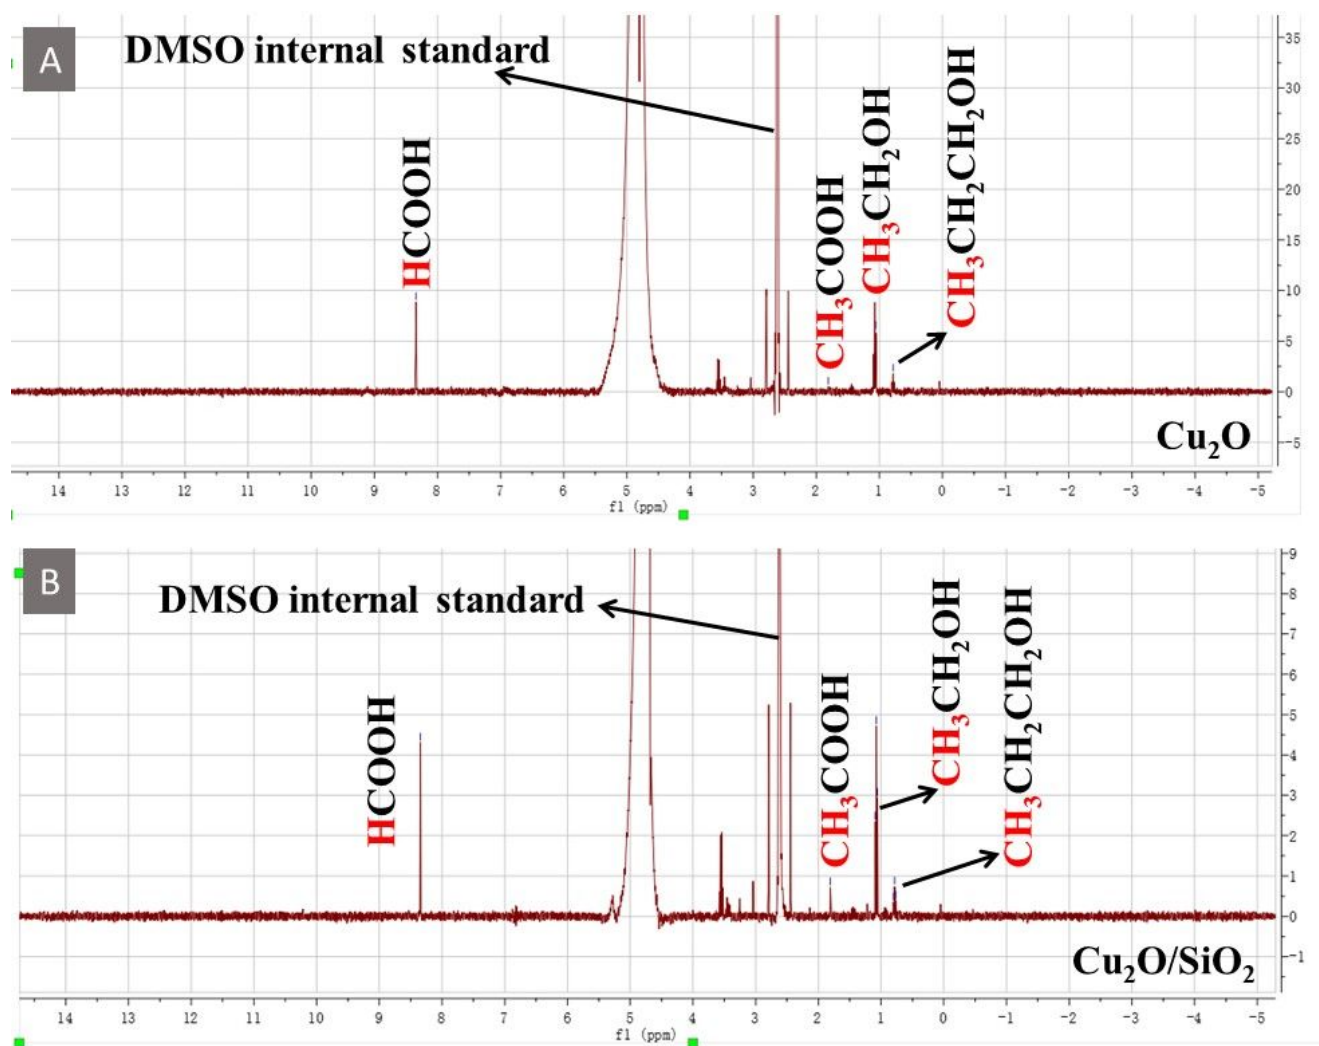

**Figure S14.** Spectra of  $^1\text{H}$  NMR record after the  $\text{CO}_2$ RR on (A)  $\text{Cu}_2\text{O}$ , and (B)  $\text{Cu}_2\text{O/SiO}_2$  at  $-1.2$  V vs. RHE.



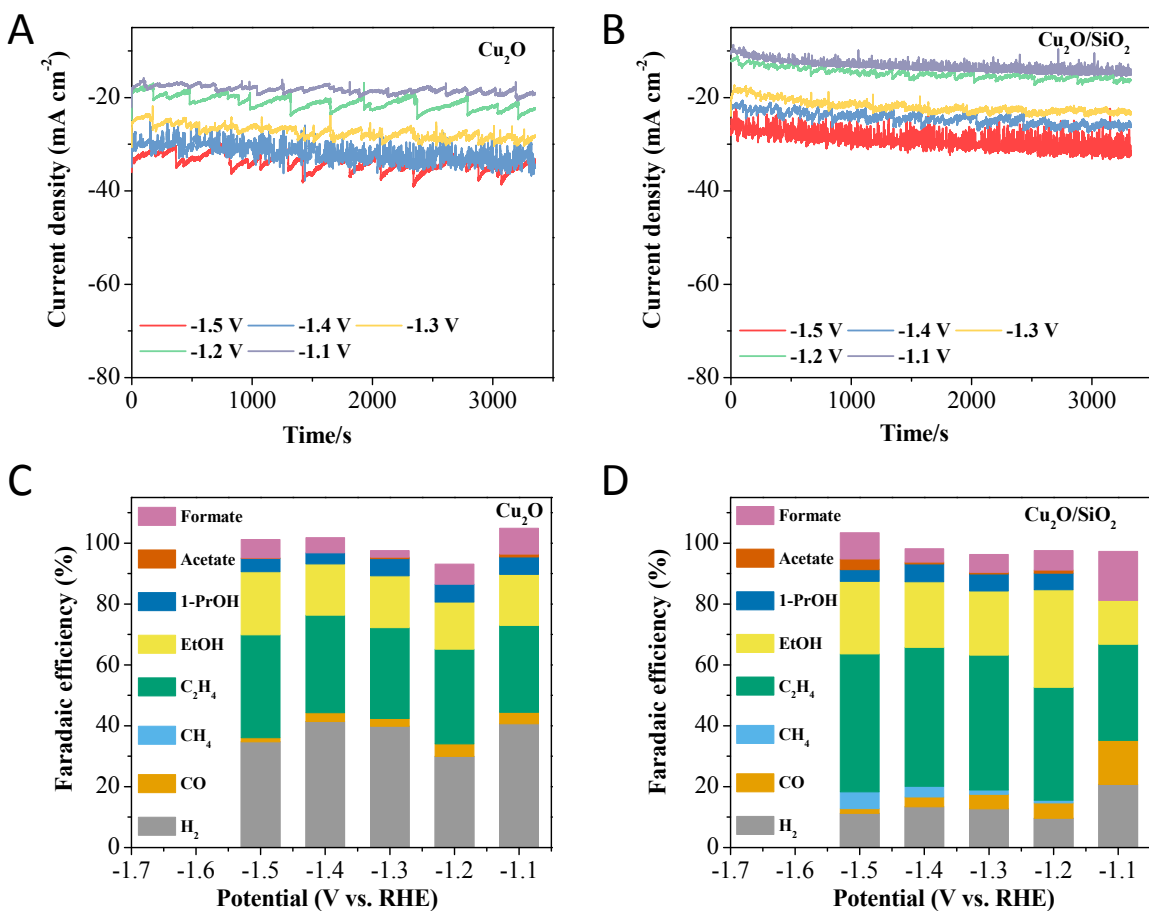

**Figure S15.** (A, B) The  $i$ - $t$  curves recorded in  $\text{CO}_2$ -saturated  $0.1 \text{ M KHCO}_3$  at various potentials for  $\text{Cu}_2\text{O}$  (A), and  $\text{Cu}_2\text{O}/\text{SiO}_2$  (B) in the H-type cell. (C, D) The corresponding Faradaic efficiency for  $\text{Cu}_2\text{O}$  (C) and  $\text{Cu}_2\text{O}/\text{SiO}_2$  (D).

**Table S1.** The FE of H<sub>2</sub> and C<sub>2+</sub> products using various copper-based catalysts for CO<sub>2</sub>RR in the reported literature.

| Catalysts                          | Substrates    | Cell type | Electrolyte             | E (vs. RHE) | Faradaic efficiency (FE, %) |                 | Ref       |
|------------------------------------|---------------|-----------|-------------------------|-------------|-----------------------------|-----------------|-----------|
|                                    |               |           |                         |             | H <sub>2</sub>              | C <sub>2+</sub> |           |
| Cu <sub>2</sub> O/SiO <sub>2</sub> | Glassy carbon | H-cell    | 0.1 M KHCO <sub>3</sub> | −1.20 V     | 9.6                         | 75.6            | This work |
| Cu <sub>2</sub> O                  | Carbon paper  |           | 0.1 M KHCO <sub>3</sub> | −1.05 V     | 18.0                        | 60              | 11        |
| Nano wrinkled Cu                   | Glassy carbon |           | 0.1 M KHCO <sub>3</sub> | −1.10 V     | -                           | 57              | 12        |
| Cu                                 | -             |           | 0.1 M KHCO <sub>3</sub> | −1.00 V     | <10%                        | 76              | 13        |
| Cu <sub>2</sub> O NP/C             | Glassy carbon |           | 0.1 M KHCO <sub>3</sub> | −1.20 V     | 30                          | 73              | 14        |
| Polycrystalline Copper             | Cu disk       |           | 0.1 M KHCO <sub>3</sub> | −1.10 V     | 15.5                        | 78.2            | 15        |
| Cu nano cube                       | Glassy carbon |           | 0.1 M KHCO <sub>3</sub> | −1.00 V     | -                           | 73              | 16        |
| Cu <sub>4</sub> Zn                 | Glassy carbon | Flow cell | 0.5 M KHCO <sub>3</sub> | −1.05 V     | 42.28                       | 51.38           | 17        |
| CuAg alloy                         | Carbon paper  |           | 1 M KOH                 | −0.70 V     | 9.8                         | 85.1            | 18        |
| Cu-CuI                             | Carbon paper  |           | 1 M KOH                 | −0.87 V     | 10-15                       | 71              | 19        |
| CuO-CeO <sub>2</sub>               | PTFE membrane |           | 1 M KOH                 | −1.12 V     | -                           | 78.2            | 20        |
| Hierarchical Copper                | Cu GDE        |           | 1 M KOH                 | −0.68 V     | 17.54                       | 63              | 21        |
| Cu nanoparticles                   | Carbon paper  |           | 1 M KOH                 | −0.87 V     | 7                           | 70              | 22        |

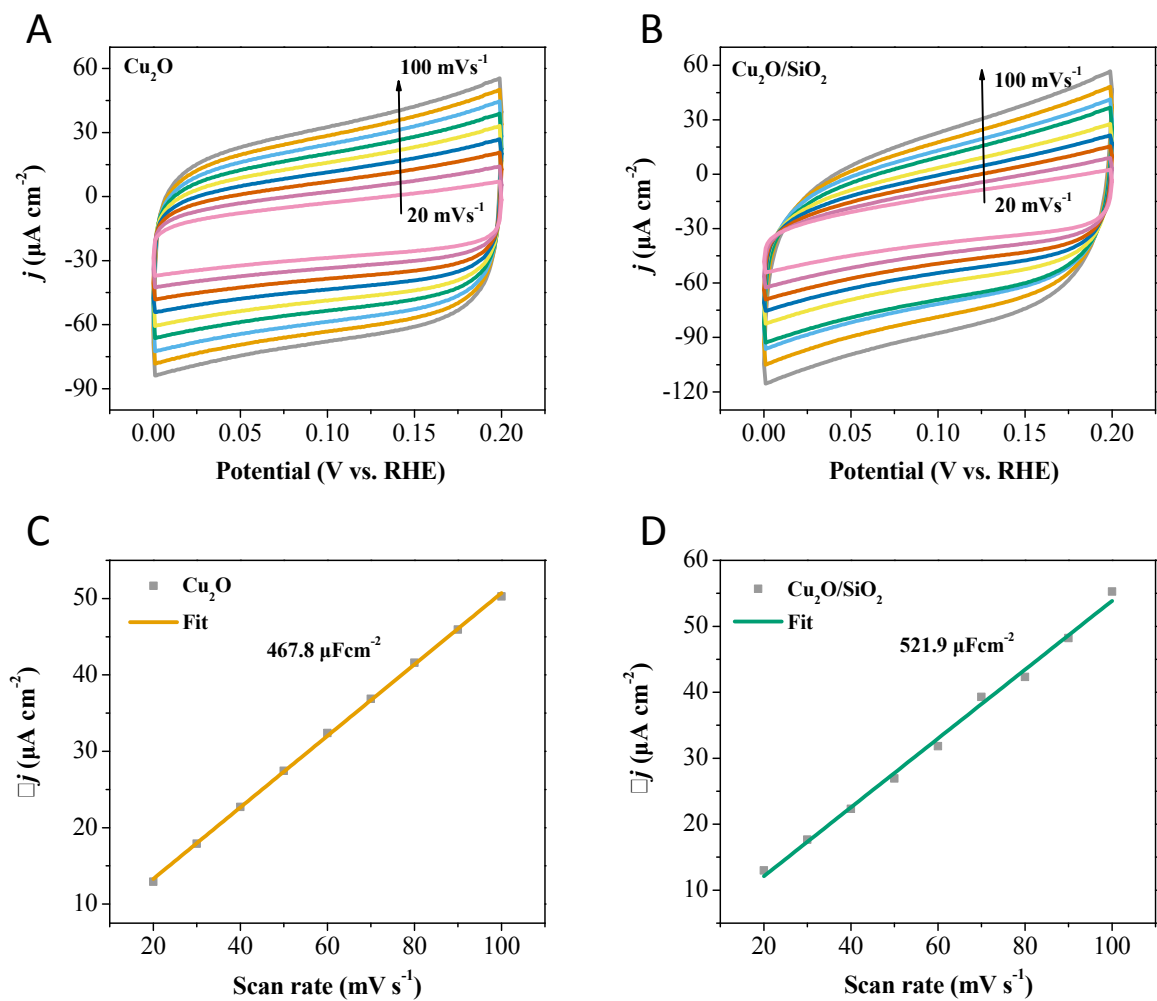

**Figure S16.** (A, B) Cyclic voltammograms of  $\text{Cu}_2\text{O}$  (A) and  $\text{Cu}_2\text{O}/\text{SiO}_2$  (B) in Ar-saturated 0.1 M  $\text{KHCO}_3$  scanned from 0.0 to 0.2 V vs. RHE at different scan rates. (C, D) Current density plotted against CV scan rates for (C)  $\text{Cu}_2\text{O}$  and (D)  $\text{Cu}_2\text{O}/\text{SiO}_2$ .

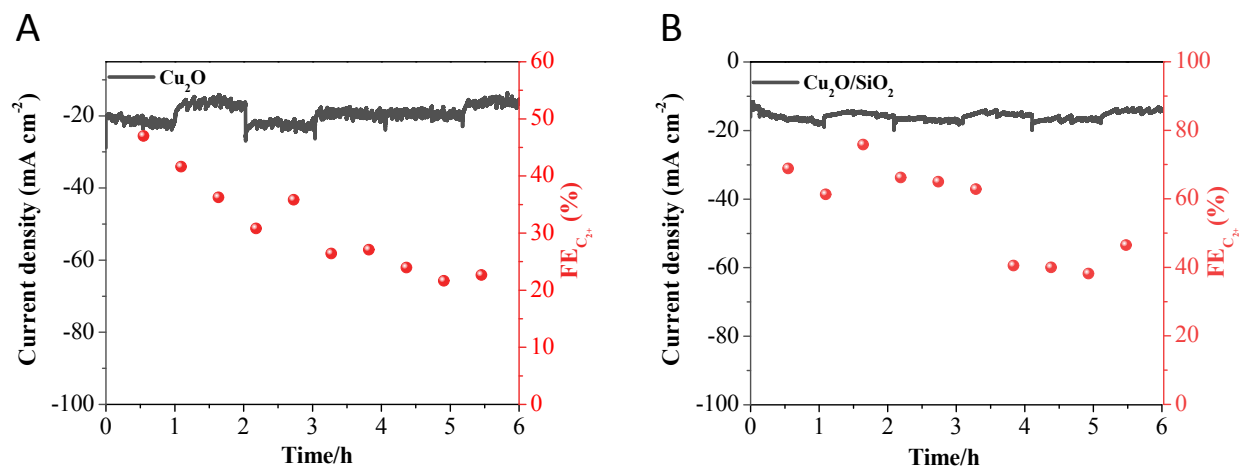

**Figure S17.** Stability tests were performed on  $\text{Cu}_2\text{O}$  (A) and  $\text{Cu}_2\text{O/SiO}_2$  (B) electrodes for 6 h at  $-1.2$  V vs. RHE in  $\text{CO}_2$ -saturated  $0.1$  M  $\text{KHCO}_3$ . The right axis is the corresponding Faradaic efficiency of  $\text{C}_{2+}$  products.

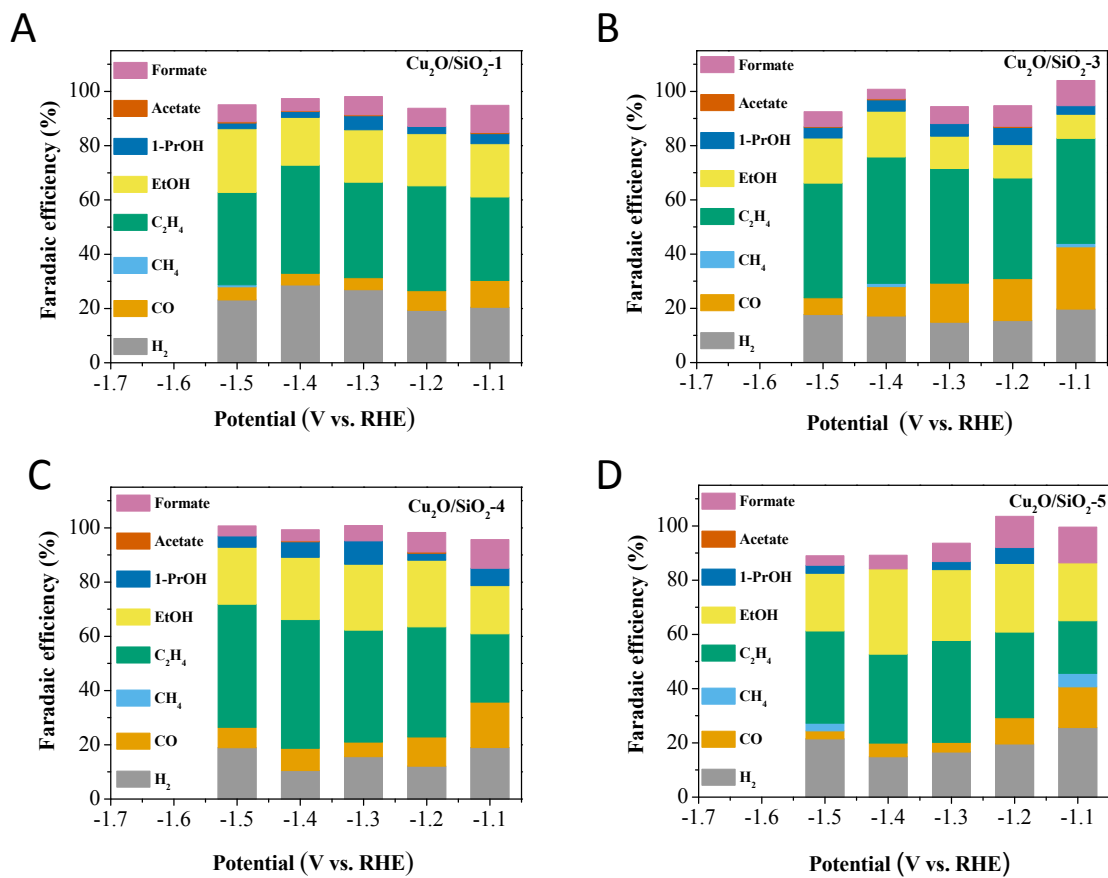

**Figure S18.** The products distribution of (A)  $\text{Cu}_2\text{O}/\text{SiO}_2\text{-1}$ , (B)  $\text{Cu}_2\text{O}/\text{SiO}_2\text{-3}$ , (C)  $\text{Cu}_2\text{O}/\text{SiO}_2\text{-4}$  and (D)  $\text{Cu}_2\text{O}/\text{SiO}_2\text{-5}$ .

**Table S2.** Faradaic efficiencies of CO<sub>2</sub> electroreduction products on Cu<sub>2</sub>O/SiO<sub>2</sub>-1/3/4/5 composites electrodes under different applied potentials.

| Catalysts<br>(Potential<br>vs. RHE)                | Faradaic efficiency (%) |       |                 |                               |                                  |                                  |                      |       |        |
|----------------------------------------------------|-------------------------|-------|-----------------|-------------------------------|----------------------------------|----------------------------------|----------------------|-------|--------|
|                                                    | H <sub>2</sub>          | CO    | CH <sub>4</sub> | C <sub>2</sub> H <sub>4</sub> | C <sub>2</sub> H <sub>5</sub> OH | C <sub>3</sub> H <sub>7</sub> OH | CH <sub>3</sub> COOH | HCOOH | Total  |
| Cu <sub>2</sub> O/SiO <sub>2</sub> -<br>1 (-1.1 V) | 20.44                   | 9.91  | 0               | 30.78                         | 19.61                            | 3.71                             | 0.4                  | 10.02 | 94.87  |
| Cu <sub>2</sub> O/SiO <sub>2</sub> -<br>1 (-1.2 V) | 19.29                   | 7.28  | 0               | 38.65                         | 19.24                            | 2.62                             | 0                    | 6.71  | 93.79  |
| Cu <sub>2</sub> O/SiO <sub>2</sub> -<br>1 (-1.3 V) | 26.89                   | 4.49  | 0               | 35.2                          | 19.3                             | 5.16                             | 0.33                 | 6.77  | 98.14  |
| Cu <sub>2</sub> O/SiO <sub>2</sub> -<br>1 (-1.4 V) | 28.66                   | 4.33  | 0               | 39.83                         | 17.64                            | 2.15                             | 0.23                 | 4.54  | 97.38  |
| Cu <sub>2</sub> O/SiO <sub>2</sub> -<br>1 (-1.5 V) | 23.17                   | 4.84  | 0.75            | 34.00                         | 23.50                            | 2.10                             | 0.46                 | 6.27  | 95.09  |
| Cu <sub>2</sub> O/SiO <sub>2</sub> -<br>3 (-1.1 V) | 19.76                   | 22.90 | 1.32            | 38.69                         | 8.89                             | 3.18                             | 0                    | 9.27  | 104.01 |
| Cu <sub>2</sub> O/SiO <sub>2</sub> -<br>3 (-1.2 V) | 15.47                   | 15.47 | 0               | 37.13                         | 12.31                            | 6.32                             | 0.44                 | 7.59  | 94.73  |
| Cu <sub>2</sub> O/SiO <sub>2</sub> -<br>3 (-1.3 V) | 14.86                   | 14.43 | 0               | 42.31                         | 11.90                            | 4.64                             | 0                    | 6.29  | 94.43  |
| Cu <sub>2</sub> O/SiO <sub>2</sub> -<br>3 (-1.4 V) | 17.17                   | 10.82 | 1.21            | 46.59                         | 16.90                            | 4.17                             | 0.44                 | 3.51  | 100.81 |
| Cu <sub>2</sub> O/SiO <sub>2</sub> -<br>3 (-1.5 V) | 17.73                   | 6.14  | 0               | 42.30                         | 16.67                            | 3.95                             | 0.25                 | 5.44  | 92.48  |
| Cu <sub>2</sub> O/SiO <sub>2</sub> -<br>4 (-1.1 V) | 19.00                   | 16.74 | 0               | 25.18                         | 17.77                            | 6.44                             | 0                    | 10.52 | 95.65  |
| Cu <sub>2</sub> O/SiO <sub>2</sub> -<br>4 (-1.2 V) | 12.13                   | 10.76 | 0               | 40.58                         | 24.63                            | 2.52                             | 0.46                 | 7.21  | 98.29  |
| Cu <sub>2</sub> O/SiO <sub>2</sub> -<br>4 (-1.3 V) | 15.65                   | 5.36  | 0               | 41.28                         | 24.31                            | 8.59                             | 0                    | 5.70  | 98.19  |
| Cu <sub>2</sub> O/SiO <sub>2</sub> -<br>4 (-1.4 V) | 10.50                   | 8.19  | 0               | 47.48                         | 22.97                            | 5.72                             | 0.34                 | 4.11  | 99.31  |

|                                                |       |       |      |       |       |      |   |       |        |
|------------------------------------------------|-------|-------|------|-------|-------|------|---|-------|--------|
| Cu <sub>2</sub> O/SiO <sub>2</sub> -4 (-1.5 V) | 18.95 | 7.51  | 0    | 45.41 | 20.97 | 4.18 | 0 | 3.72  | 100.74 |
| Cu <sub>2</sub> O/SiO <sub>2</sub> -5 (-1.1 V) | 25.62 | 15.03 | 5.00 | 19.40 | 21.34 | 0    | 0 | 13.18 | 99.57  |
| Cu <sub>2</sub> O/SiO <sub>2</sub> -5 (-1.2 V) | 19.58 | 9.70  | 0    | 31.57 | 25.30 | 5.90 | 0 | 11.52 | 103.57 |
| Cu <sub>2</sub> O/SiO <sub>2</sub> -5 (-1.3 V) | 16.61 | 3.59  | 0    | 37.6  | 26.06 | 3.01 | 0 | 6.78  | 93.65  |
| Cu <sub>2</sub> O/SiO <sub>2</sub> -5 (-1.4 V) | 14.87 | 5.03  | 0    | 32.83 | 31.44 | 0    | 0 | 5.06  | 89.23  |
| Cu <sub>2</sub> O/SiO <sub>2</sub> -5 (-1.5 V) | 21.50 | 2.92  | 2.87 | 34.00 | 21.29 | 2.95 | 0 | 3.51  | 89.04  |

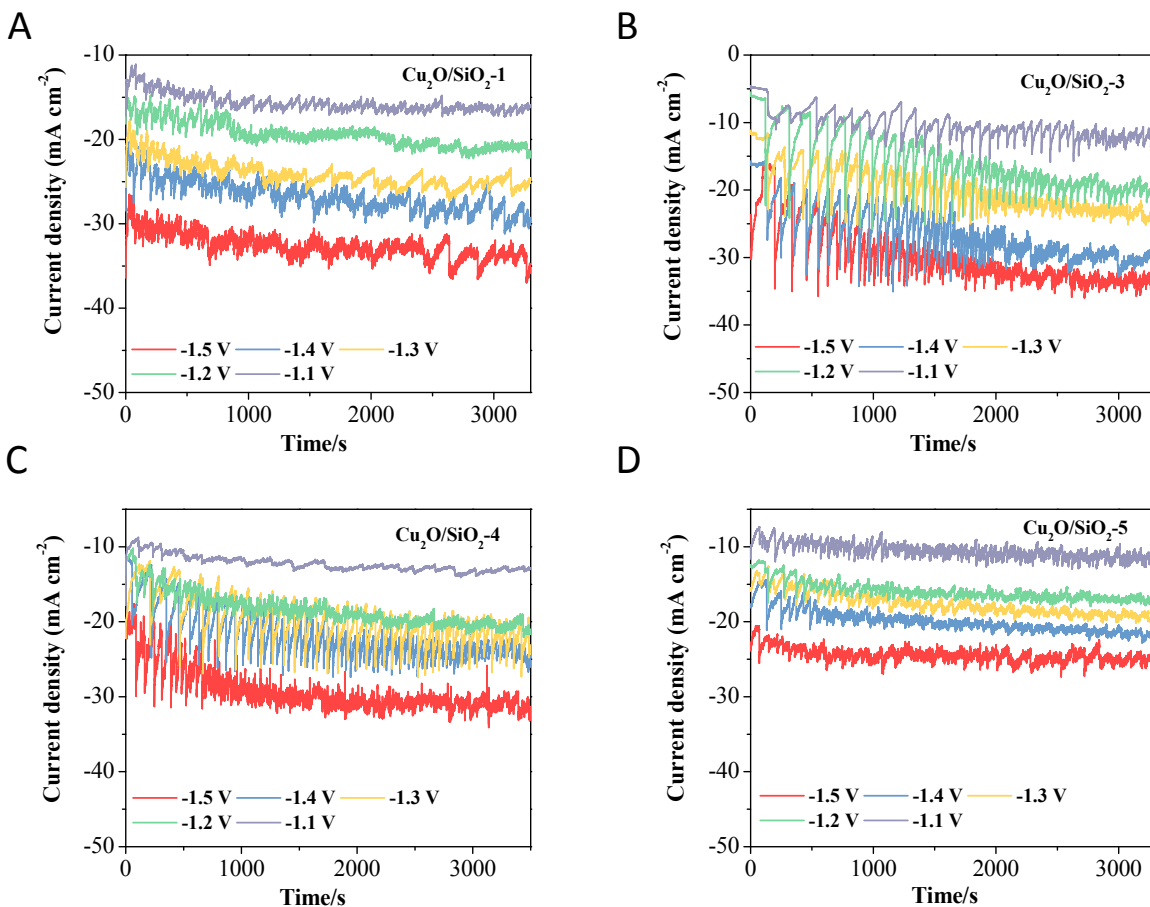

**Figure S19.** The i-t curves were record on (A) Cu<sub>2</sub>O/SiO<sub>2</sub>-1, (B) Cu<sub>2</sub>O/SiO<sub>2</sub>-3, (C) Cu<sub>2</sub>O/SiO<sub>2</sub>-4 and (D) Cu<sub>2</sub>O/SiO<sub>2</sub>-5 in CO<sub>2</sub>-saturated 0.1M KHCO<sub>3</sub>.

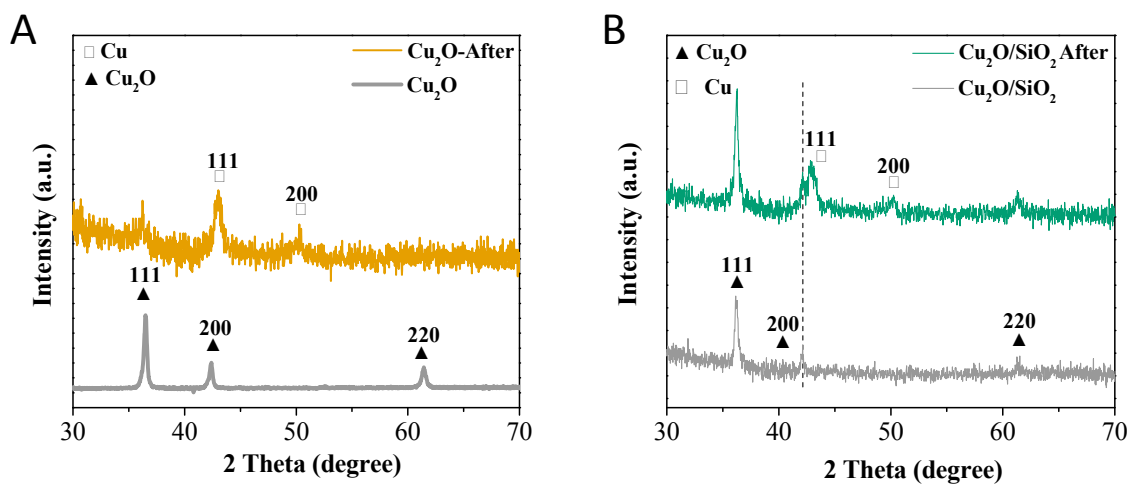

**Figure S20.** Crystal phase evolution analysis on (A) Cu<sub>2</sub>O and (B) Cu<sub>2</sub>O/SiO<sub>2</sub>. The tests were performed on  $-1.2$  V vs. RHE in CO<sub>2</sub>-saturated 0.1 M KHCO<sub>3</sub>.



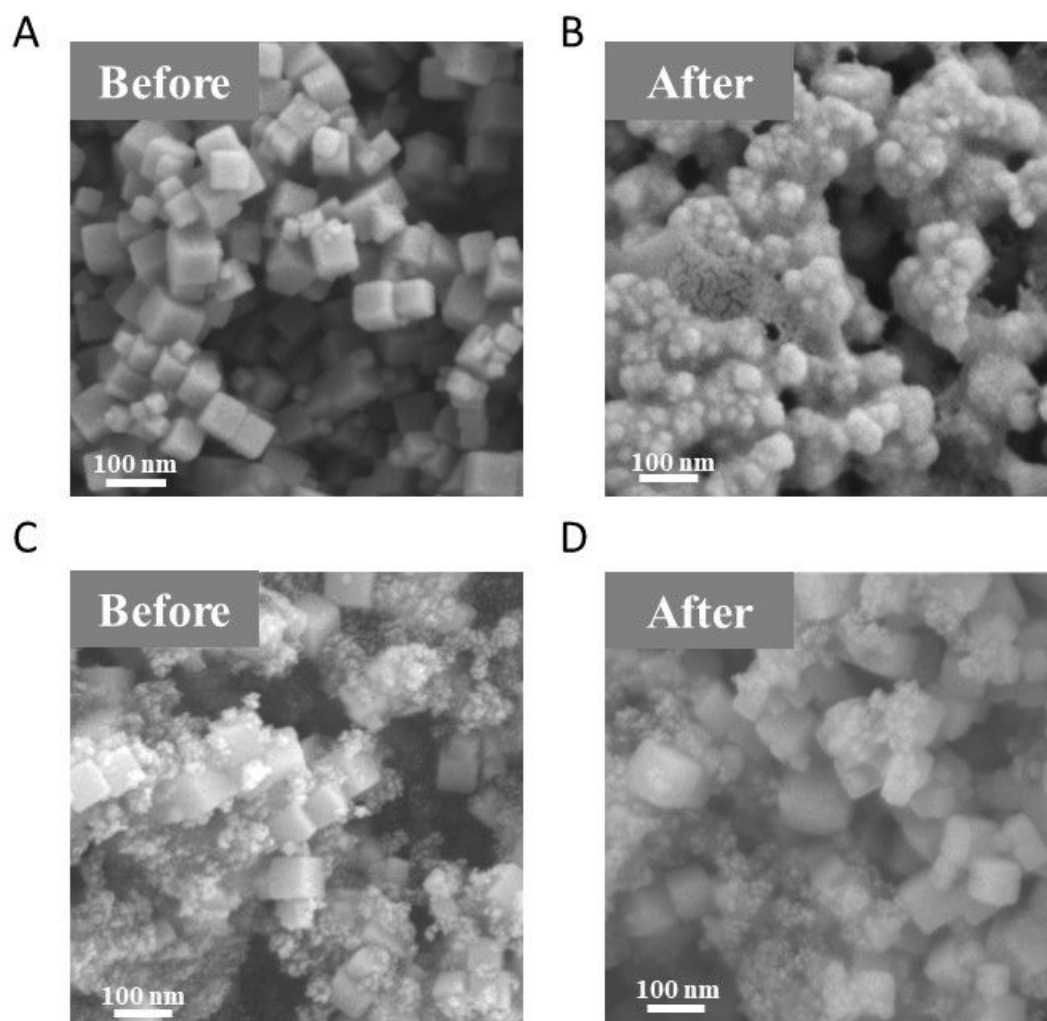

**Figure S21.** SEM images for Cu<sub>2</sub>O (A, B) and Cu<sub>2</sub>O/SiO<sub>2</sub> (C, D) before/after electrolysis operated at  $-1.2$  V vs. RHE in CO<sub>2</sub>-saturated 0.1 M KHCO<sub>3</sub>.

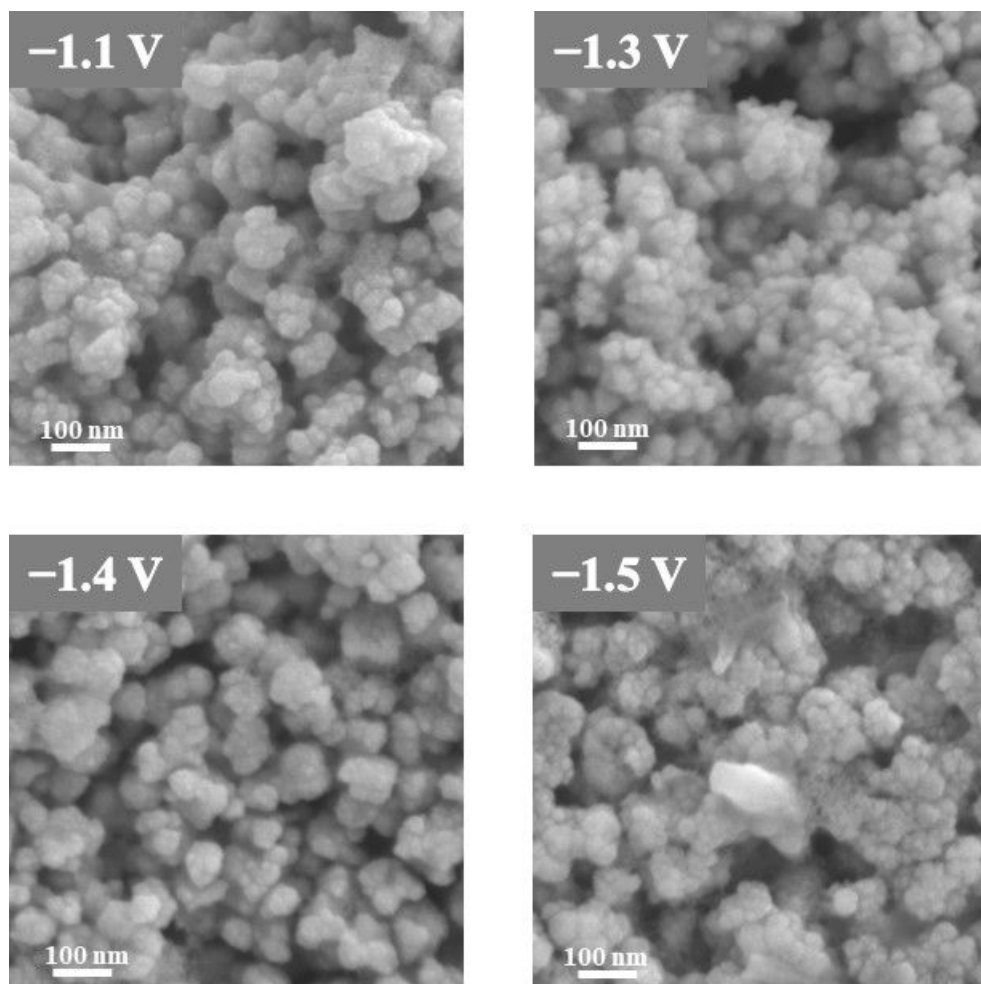

**Figure S22.** SEM images on the Cu<sub>2</sub>O after electrolysis operated at various potentials in CO<sub>2</sub>-saturated 0.1 M KHCO<sub>3</sub>.

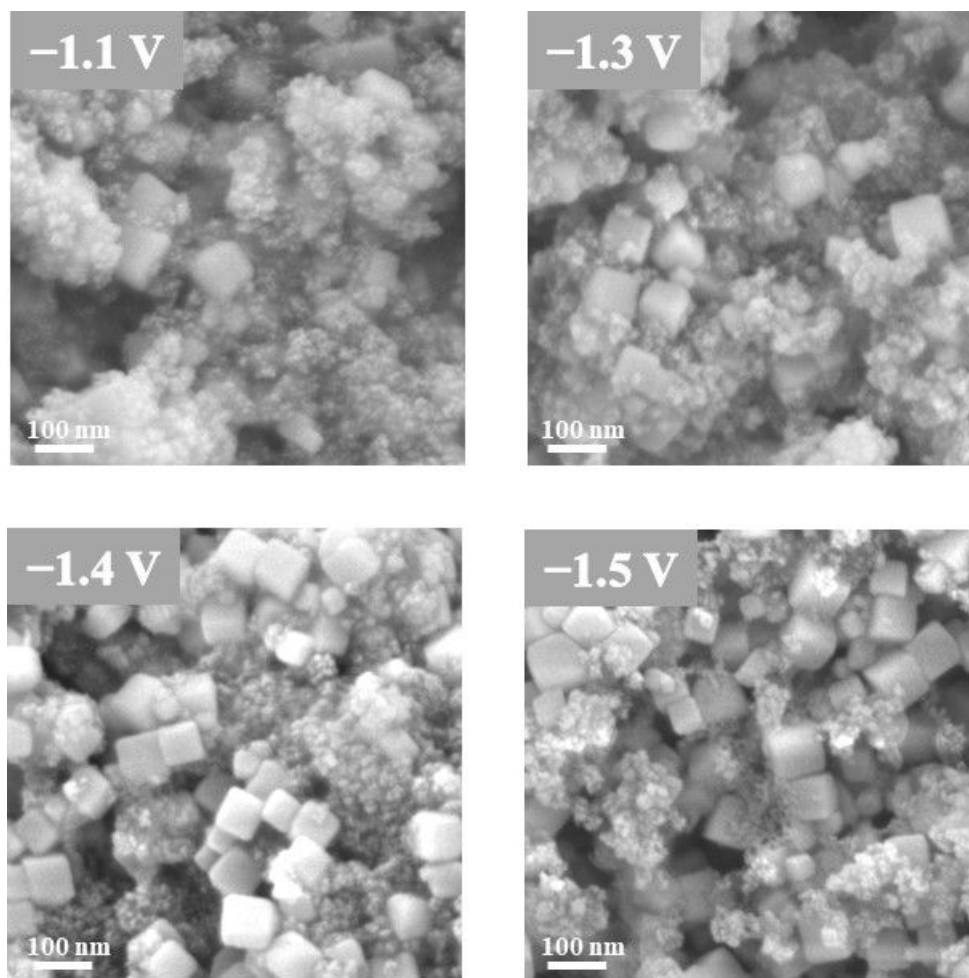

**Figure S23.** SEM images on the Cu<sub>2</sub>O/SiO<sub>2</sub> after electrolysis operated at various potentials in CO<sub>2</sub>-saturated 0.1 M KHCO<sub>3</sub>.

**Table S3.** Mass fraction of Cu and Si of Cu<sub>2</sub>O/SiO<sub>2</sub>-1/2/3/4/5 composites using FESEM–EDS elemental analysis before and after reaction at –1.2 V in CO<sub>2</sub>-saturated 0.1 M KHCO<sub>3</sub>.

| Catalysts                             | Before reaction |              |                       | After reaction |              |                       |
|---------------------------------------|-----------------|--------------|-----------------------|----------------|--------------|-----------------------|
|                                       | Cu<br>(wt %)    | Si<br>(wt %) | Mass Ratio<br>(Cu/Si) | Cu<br>(wt %)   | Si<br>(wt %) | Mass Ratio<br>(Cu/Si) |
| Cu <sub>2</sub> O/SiO <sub>2</sub> -1 | 80.74           | 5.07         | 15.93                 | 88.10          | 4.20         | 20.98                 |
| Cu <sub>2</sub> O/SiO <sub>2</sub> -2 | 71.59           | 9.90         | 7.23                  | 78.80          | 7.10         | 11.10                 |
| Cu <sub>2</sub> O/SiO <sub>2</sub> -3 | 72.37           | 10.30        | 7.02                  | 76.90          | 7.30         | 10.53                 |
| Cu <sub>2</sub> O/SiO <sub>2</sub> -4 | 63.80           | 13.90        | 4.59                  | 66.90          | 11.30        | 5.92                  |
| Cu <sub>2</sub> O/SiO <sub>2</sub> -5 | 59.30           | 16.40        | 3.62                  | 64.00          | 14.20        | 4.51                  |

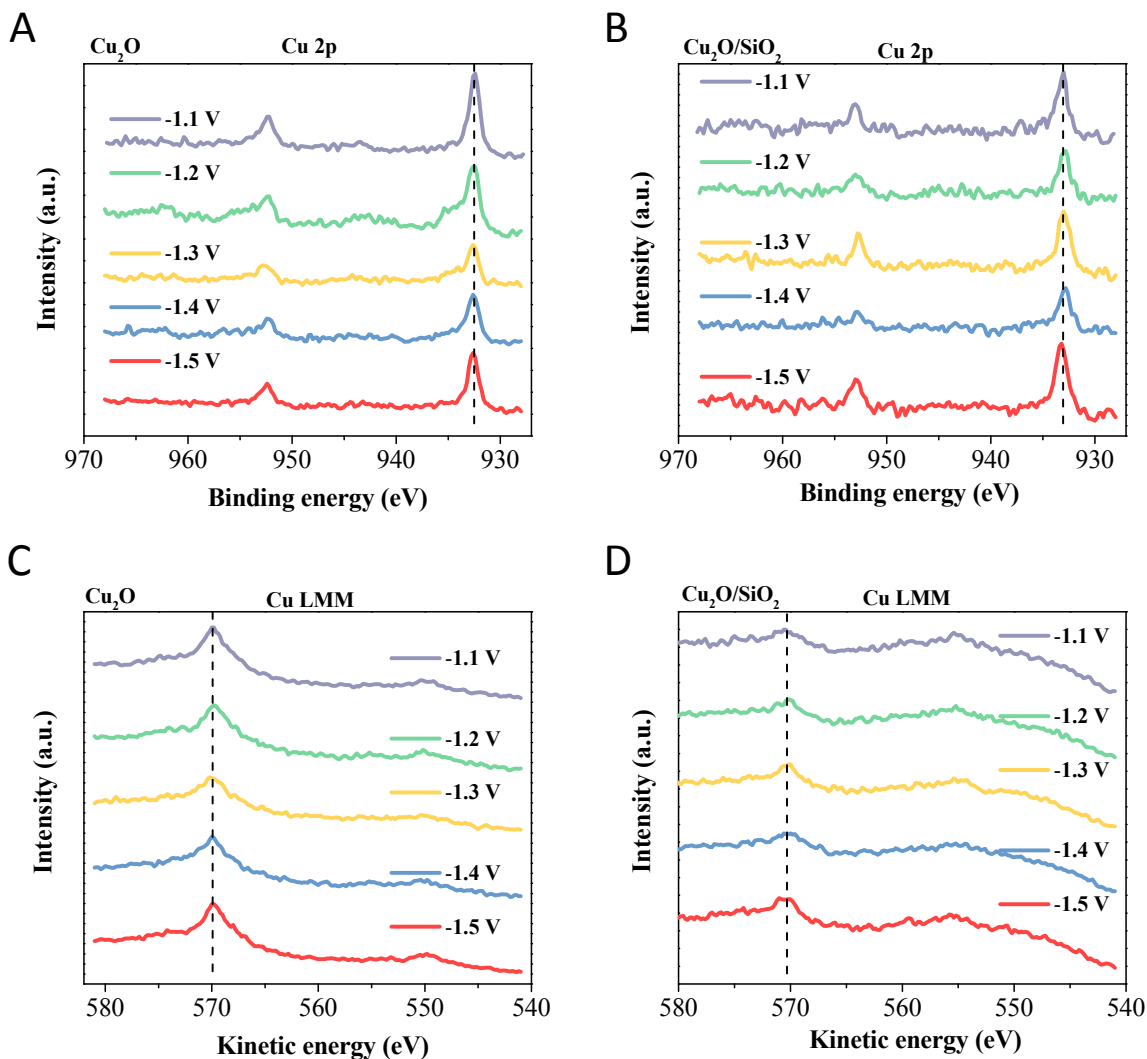

**Figure S24.** Cu 2p spectra (A, B) and Cu Auger LMM spectra (C, D) for Cu<sub>2</sub>O and Cu<sub>2</sub>O/SiO<sub>2</sub> after electrolysis at various potentials in CO<sub>2</sub>-saturated 0.1 M KHCO<sub>3</sub> for specified periods.

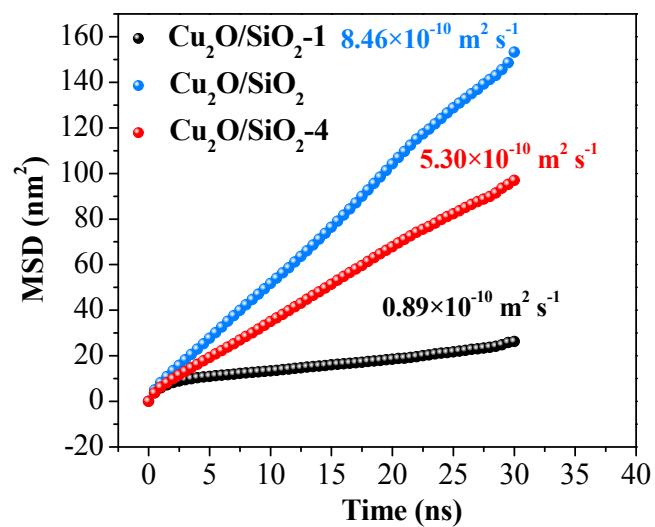

**Figure S25.** The dependence of mean square displacement (MSD) versus time for Cu<sub>2</sub>O/SiO<sub>2</sub>-1, Cu<sub>2</sub>O/SiO<sub>2</sub> and Cu<sub>2</sub>O/SiO<sub>2</sub>-4.

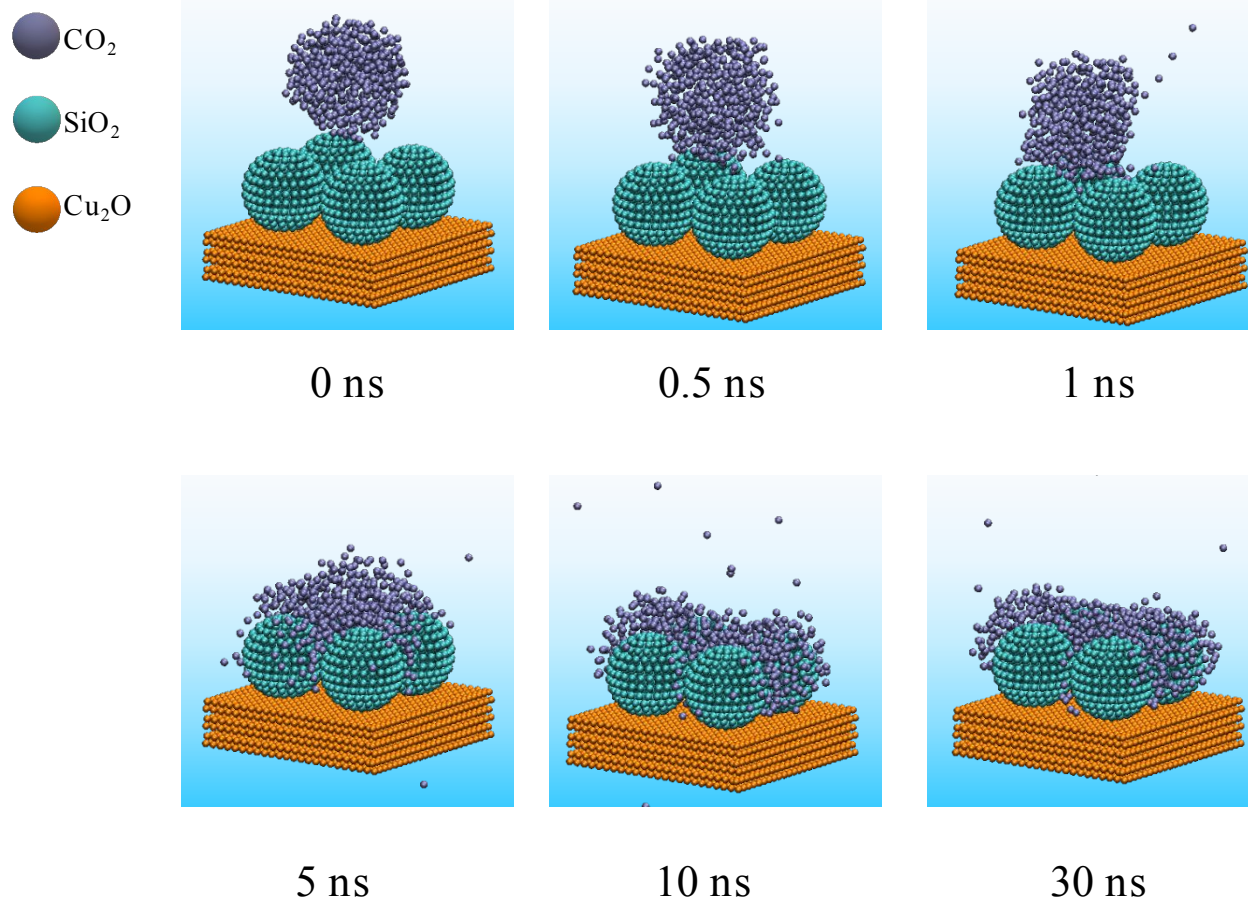

**Figure S26.** Evolution of typical snapshots of CO<sub>2</sub> diffusion dynamics on Cu<sub>2</sub>O/SiO<sub>2</sub>-4.

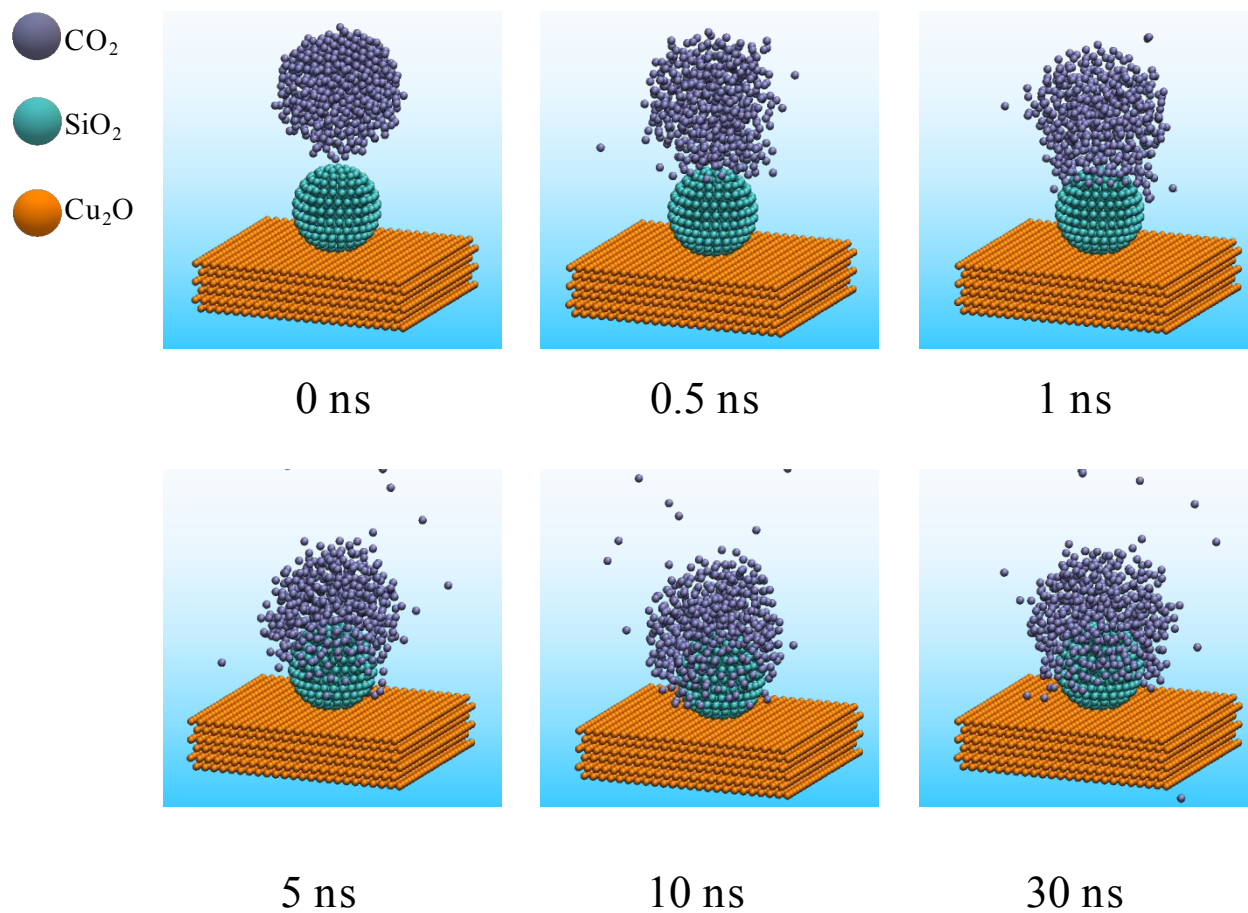

**Figure S27.** Evolution of typical snapshots of CO<sub>2</sub> diffusion dynamics on Cu<sub>2</sub>O/SiO<sub>2</sub>-1.

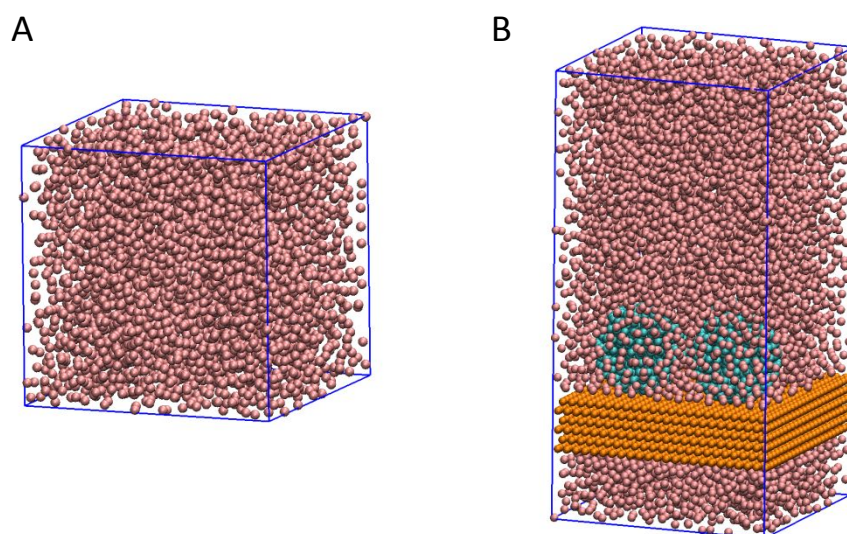

**Figure S28.** Water simulation box in the (A) absence and (B) presence of hydrophobic SiO<sub>2</sub> aerosol. H<sub>2</sub>O molecular (pink), SiO<sub>2</sub> particles (cyan), and Cu<sub>2</sub>O (orange).



## References

1. Hess B.; Kutzner C.; Spoel van der D.; Lindahl E., GROMACS 4: Algorithms for Highly Efficient, Load-Balanced, and Scalable Molecular Simulation. *J. Chem. Theory Comput.* **2008**, *4*, 435-447.
2. Bai, C.; Herzfeld, J., Surface Propensities of the Self-Ions of Water. *ACS Cent. Sci.* **2016**, *2*, 225-231.
3. Kresse G.; Furthmüller J., Efficient iterative schemes for ab initio total-energy calculations using a plane-wave basis set. *Phys. Rev. B* **1996**, *54*, 11169-11186.
4. Blochl, P. E., Projector augmented-wave method. *Phys. Rev. B Condens. Matter.* **1994**, *50*, 17953-17979.
5. Perdew J. P.; Burke K.; Ernzerhof M., Generalized Gradient Approximation Made Simple. *Phys. Rev. Lett.* **1996**, *77*, 3865-3868.
6. Moller, T.; Scholten, F.; Thanh, T. N.; Sinev, I.; Timoshenko, J.; Wang, X.; Jovanov, Z.; Gliech, M.; Roldan Cuenya, B.; Varela, A. S.; Strasser, P., Electrocatalytic CO<sub>2</sub> Reduction on CuO<sub>x</sub> Nanocubes: Tracking the Evolution of Chemical State, Geometric Structure, and Catalytic Selectivity using Operando Spectroscopy. *Angew. Chem. Int. Ed.* **2020**, *59*, 17974-17983.

7. Wei, Y.; Liu, J.; Cheng, F.; Chen, J., Mn-doped atomic SnO<sub>2</sub> layers for highly efficient CO<sub>2</sub> electrochemical reduction. *J. Mater. Chem. A* **2019**, *7*, 19651-19656.
8. Zhu, Z.; Li, Z.; Wang, J.; Li, R.; Chen, H.; Li, Y.; Chen, J. S.; Wu, R.; Wei, Z., Improving NiN<sub>x</sub> and pyridinic N active sites with space-confined pyrolysis for effective CO<sub>2</sub> electroreduction. *eScience* **2022**, *2*, 445-452.
9. Chen, R.; Su, H. Y.; Liu, D.; Huang, R.; Meng, X.; Cui, X.; Tian, Z. Q.; Zhang, D. H.; Deng, D., Highly Selective Production of Ethylene by the Electroreduction of Carbon Monoxide. *Angew. Chem. Int. Ed.* **2020**, *59*, 154-160.
10. Wang, K.; Liu, D.; Liu, L.; Liu, J.; Hu, X.; Li, P.; Li, M.; Vasenko, A. S.; Xiao, C.; Ding, S., Tuning the local electronic structure of oxygen vacancies over copper-doped zinc oxide for efficient CO<sub>2</sub> electroreduction. *eScience* **2022**, *2*, 518-528.
11. Zhan, C.; Dattila, F.; Rettenmaier, C.; Bergmann, A.; Kühl, S.; García-Muelas, R.; López, N.; Cuenya, B. R., Revealing the CO Coverage-Driven C–C Coupling Mechanism for Electrochemical CO<sub>2</sub> Reduction on Cu<sub>2</sub>O Nanocubes via Operando Raman Spectroscopy. *ACS Catal.* **2021**, *11*, 7694-7701.

12. Kim, J. Y.; Park, W.; Choi, C.; Kim, G.; Cho, K. M.; Lim, J.; Kim, S. J.; Al-Saggaf, A.; Gereige, I.; Lee, H.; Jung, W.-B.; Jung, Y.; Jung, H.-T., High Facets on Nanowrinkled Cu via Chemical Vapor Deposition Graphene Growth for Efficient CO<sub>2</sub> Reduction into Ethanol. *ACS Catal.* **2021**, *11*, 5658-5665.
13. Arán-Ais, R. M.; Scholten, F.; Kunze, S.; Rizo, R.; Roldan Cuenya, B., The role of in situ generated morphological motifs and Cu(i) species in C<sub>2+</sub> product selectivity during CO<sub>2</sub> pulsed electroreduction. *Nat. Energy* **2020**, *5*, 317-325.
14. Jung, H.; Lee, S. Y.; Lee, C. W.; Cho, M. K.; Won, D. H.; Kim, C.; Oh, H. S.; Min, B. K.; Hwang, Y. J., Electrochemical Fragmentation of Cu<sub>2</sub>O Nanoparticles Enhancing Selective C-C Coupling from CO<sub>2</sub> Reduction Reaction. *J. Am. Chem. Soc.* **2019**, *141*, 4624-4633.
15. Han, Z.; Kortlever, R.; Chen, H. Y.; Peters, J. C.; Agapie, T., CO<sub>2</sub> Reduction Selective for C<sub>≥2</sub> Products on Polycrystalline Copper with N-Substituted Pyridinium Additives. *ACS Cent. Sci.* **2017**, *3*, 853-859.
16. Gao, D.; Zegkinoglou, I.; Divins, N. J.; Scholten, F.; Sinev, I.; Grosse, P.; Roldan Cuenya, B., Plasma-Activated Copper Nanocube Catalysts for Efficient Carbon Dioxide Electroreduction to Hydrocarbons and Alcohols. *ACS Nano* **2017**, *11*, 4825-4831.

17. Ren, D.; Ang, B. S.-H.; Yeo, B. S., Tuning the Selectivity of Carbon Dioxide Electroreduction toward Ethanol on Oxide-Derived Cu<sub>x</sub>Zn Catalysts. *ACS Catal.* **2016**, *6*, 8239-8247.
18. Hoang T., Verma S. , Ma S. , Fister T. , Timoshenko J. , Frenkel A., Kenis P., Gewirth A., Nanoporous Copper–Silver Alloys by Additive-Controlled Electrodeposition for the Selective Electroreduction of CO<sub>2</sub> to Ethylene and Ethanol. *J. Am. Chem. Soc.* **2018**, *140*, 5791-5797.
19. Li, H.; Liu, T.; Wei, P.; Lin, L.; Gao, D.; Wang, G.; Bao, X., High-Rate CO<sub>2</sub> Electroreduction to C<sub>2+</sub> Products over a Copper-Copper Iodide Catalyst. *Angew. Chem. Int. Ed.* **2021**, *60*, 14329-14333.
20. Yan, X.; Chen, C.; Wu, Y.; Liu, S.; Chen, Y.-Z.; Feng, R.; Zhang, J.; Han, B., Efficient Electroreduction of CO<sub>2</sub> to C<sub>2+</sub> Products on CeO<sub>2</sub> modified CuO. *Chem. Sci.* **2021**, *12*, 6638-6645.
21. Niu, Z. Z.; Gao, F. Y.; Zhang, X. L.; Yang, P. P.; Liu, R.; Chi, L. P.; Wu, Z. Z.; Qin, S.; Yu, X.; Gao, M. R., Hierarchical Copper with Inherent Hydrophobicity Mitigates Electrode Flooding for High-Rate CO<sub>2</sub> Electroreduction to Multicarbon Products. *J. Am. Chem. Soc.* **2021**, *143*, 8011-8021.

22. Ma, S.; Sadakiyo, M.; Luo, R.; Heima, M.; Yamauchi, M.; Kenis, P. J. A., One-step electrosynthesis of ethylene and ethanol from CO<sub>2</sub> in an alkaline electrolyzer. *J. Power Sources* **2016**, *301*, 219-228.
